# Supplementary material for: Wolfium bonds in homodimers of MX4Y (M = Mo, W; X = F, Cl, Br; Y = O, S, Se)
Source: Royal Society of Chemistry journal article supplement (doi:10.1039/d3cp05867k), 2024-01-01
Supplement: d3cp05867k1.pdf [file d3cp05867k1.pdf]

# SUPPORTING INFORMATION

## Wolfium Bonds in Homodimers of $\text{MX}_4\text{Y}$

(M= Mo, W; X= F, Cl, Br; Y= O, S, Se)

Mariusz Michalczyk\*<sup>1</sup>, Wiktor Zierkiewicz<sup>1</sup> and Steve Scheiner<sup>2</sup>

<sup>1</sup> Faculty of Chemistry, Wrocław University of Science and Technology, Wybrzeże Wyspiańskiego 27, 50-370 Wrocław, Poland, email: mariusz.michalczyk@pwr.edu.pl

<sup>2</sup> Department of Chemistry and Biochemistry, Utah State University Logan, Utah 84322-0300, United States

**Figure S1.** QTAIM molecular diagrams for homodimers. Bond critical point positions represented by small green balls, with density listed in au of electron density. (page S2)

**Figure S2.** NCI molecular diagrams of four Mono-Y dimers. Blue isosurfaces represent areas of strong noncovalent contacts, while green and red correspond to weaker contacts and repulsions, respectively. RDG surface shown is 0.05 au of electron density and blue and red colors refer specifically to -0.03 and +0.03 au of electron density for  $\rho * \text{sign}(\lambda_2)$ . (page S8)

**Figure S3.** Geometry of Lin-Y and Mono-X conformers. (page S9)

**Table S1.** Intermolecular distances (Å) and interaction energies (kcal/mol) for alternate homodimers. (page S9)

**Table S2.** Relative total electron energy of four types of homodimers obtained within this study calculated at M062X/def2TZVPP level of theory. In each case the most stable is the bridged complex so the values of other conformers are referred to the most stable one. Data are given in kcal/mol. (page S10)

**Figure S4.** Examples of neutral  $\text{MX}_4\text{Y}$  complexes drawn from the CSD database. (page S11)

**Figure S5.** Examples of anionic homodimers of  $[\text{MoCl}_4\text{O}]^-$  drawn from the CSD database. (page S13)

**Table S3.** Cartesian coordinates of monomers and dimers. (page S14)

**Figure S1.** QTAIM molecular diagrams for homodimers. Bond critical point positions represented by small green balls, with density listed in au of electron density.

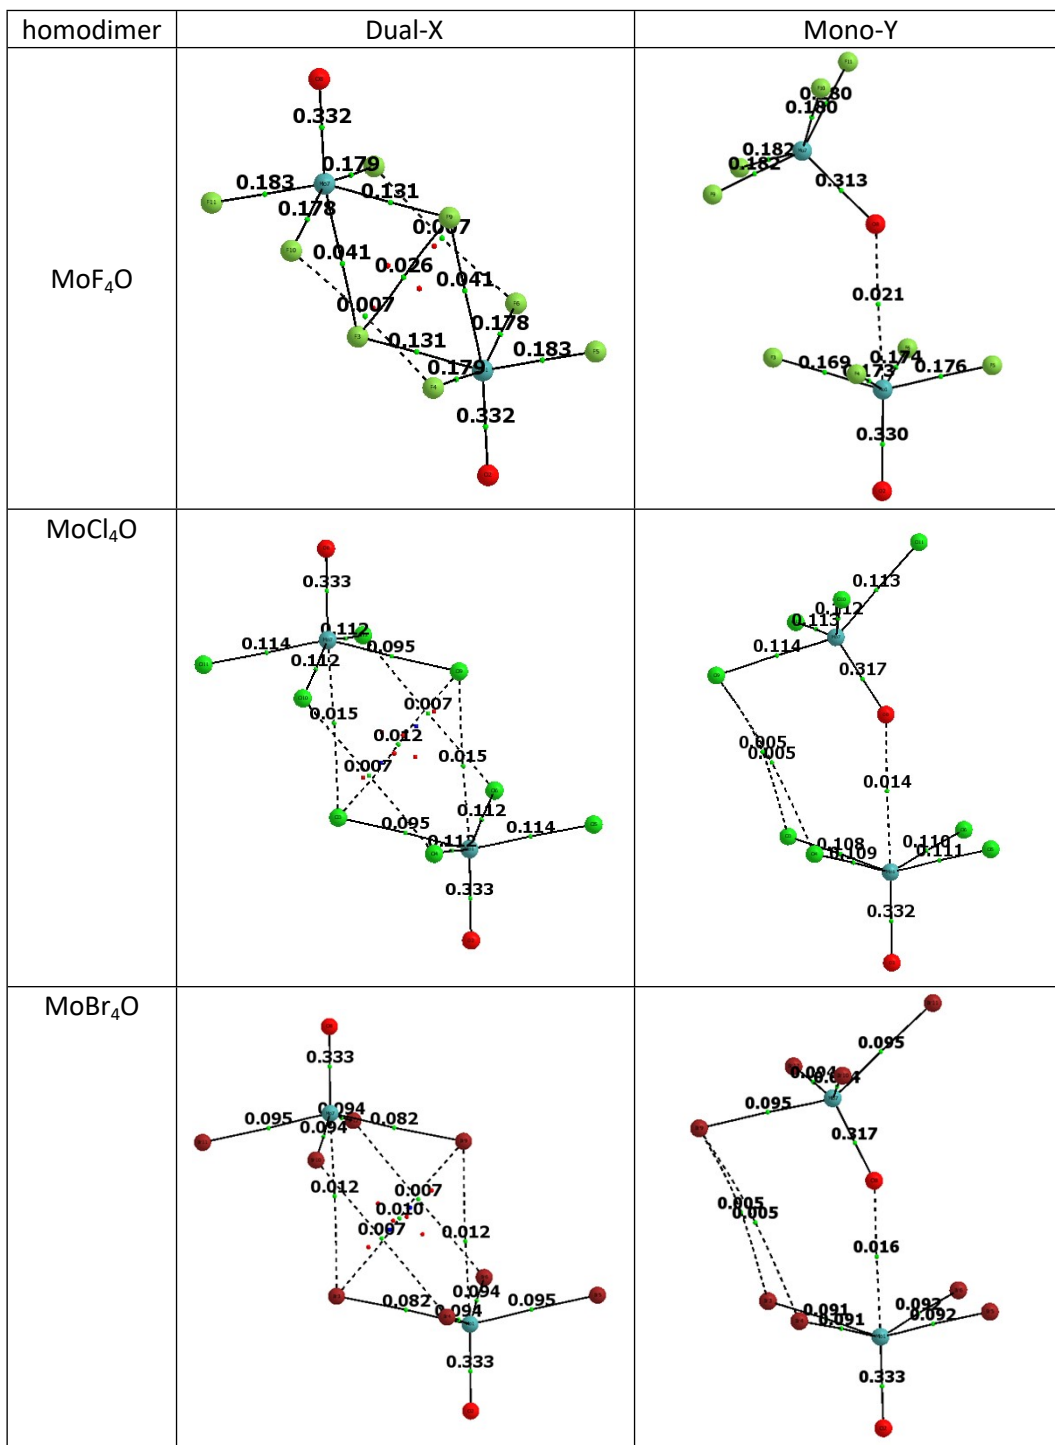

Figure S1. (continued)

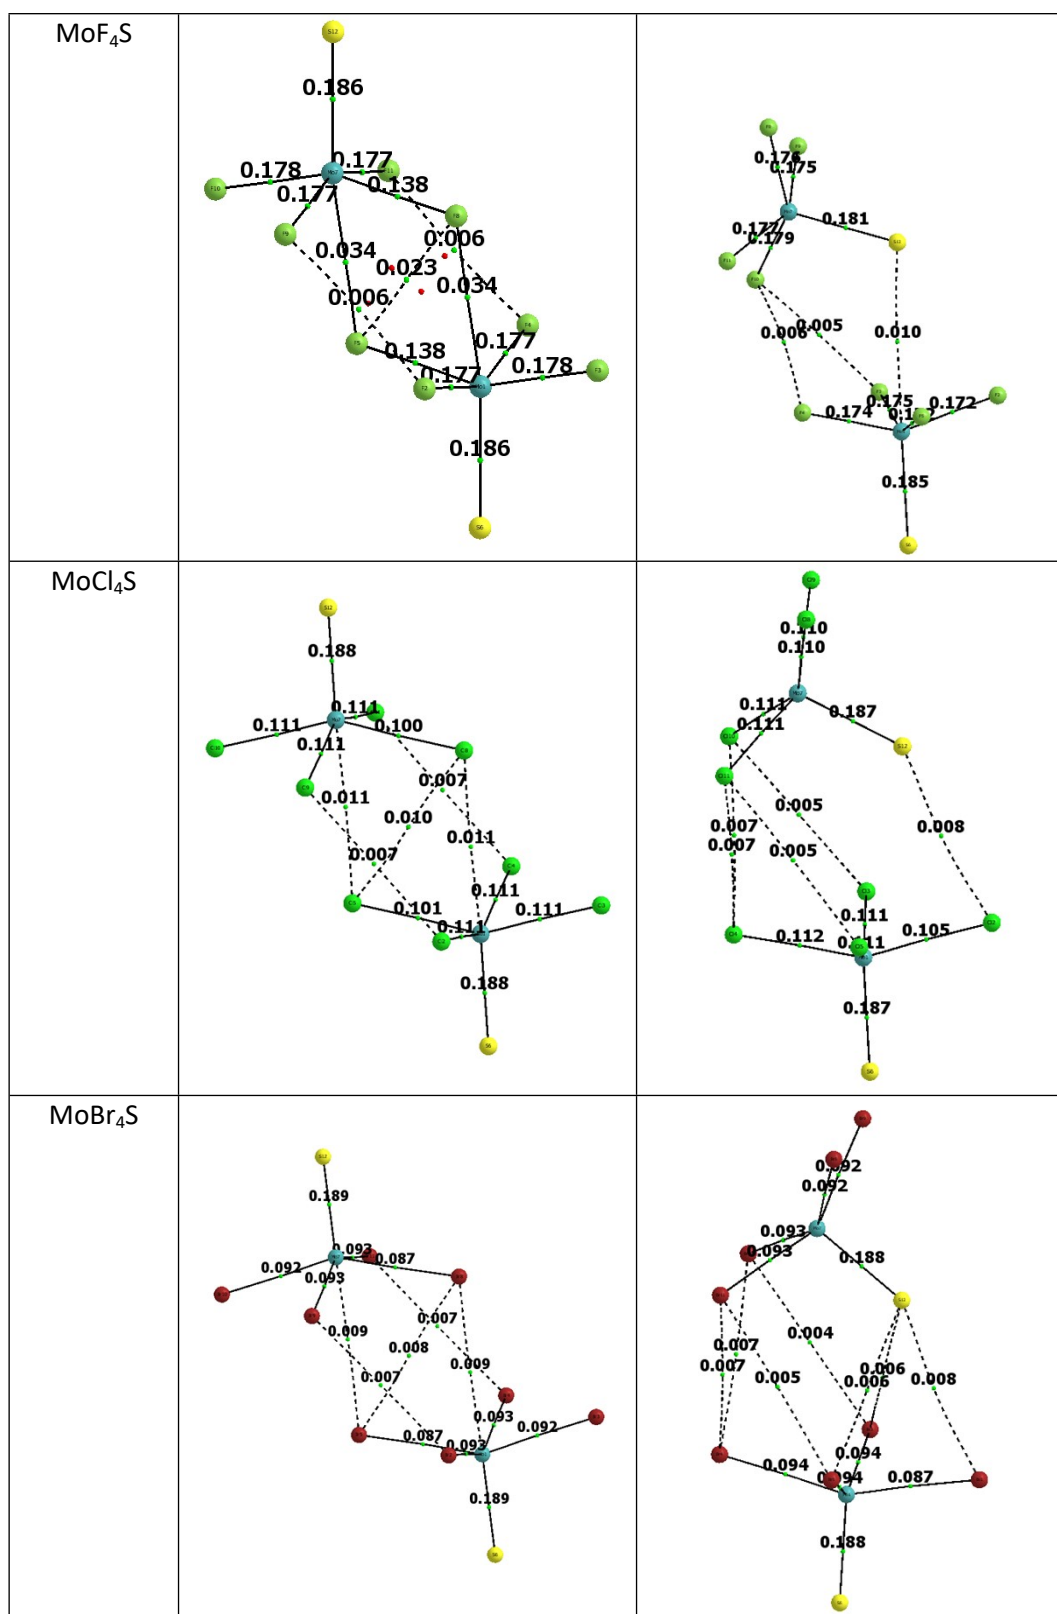

Figure S1. (continued)

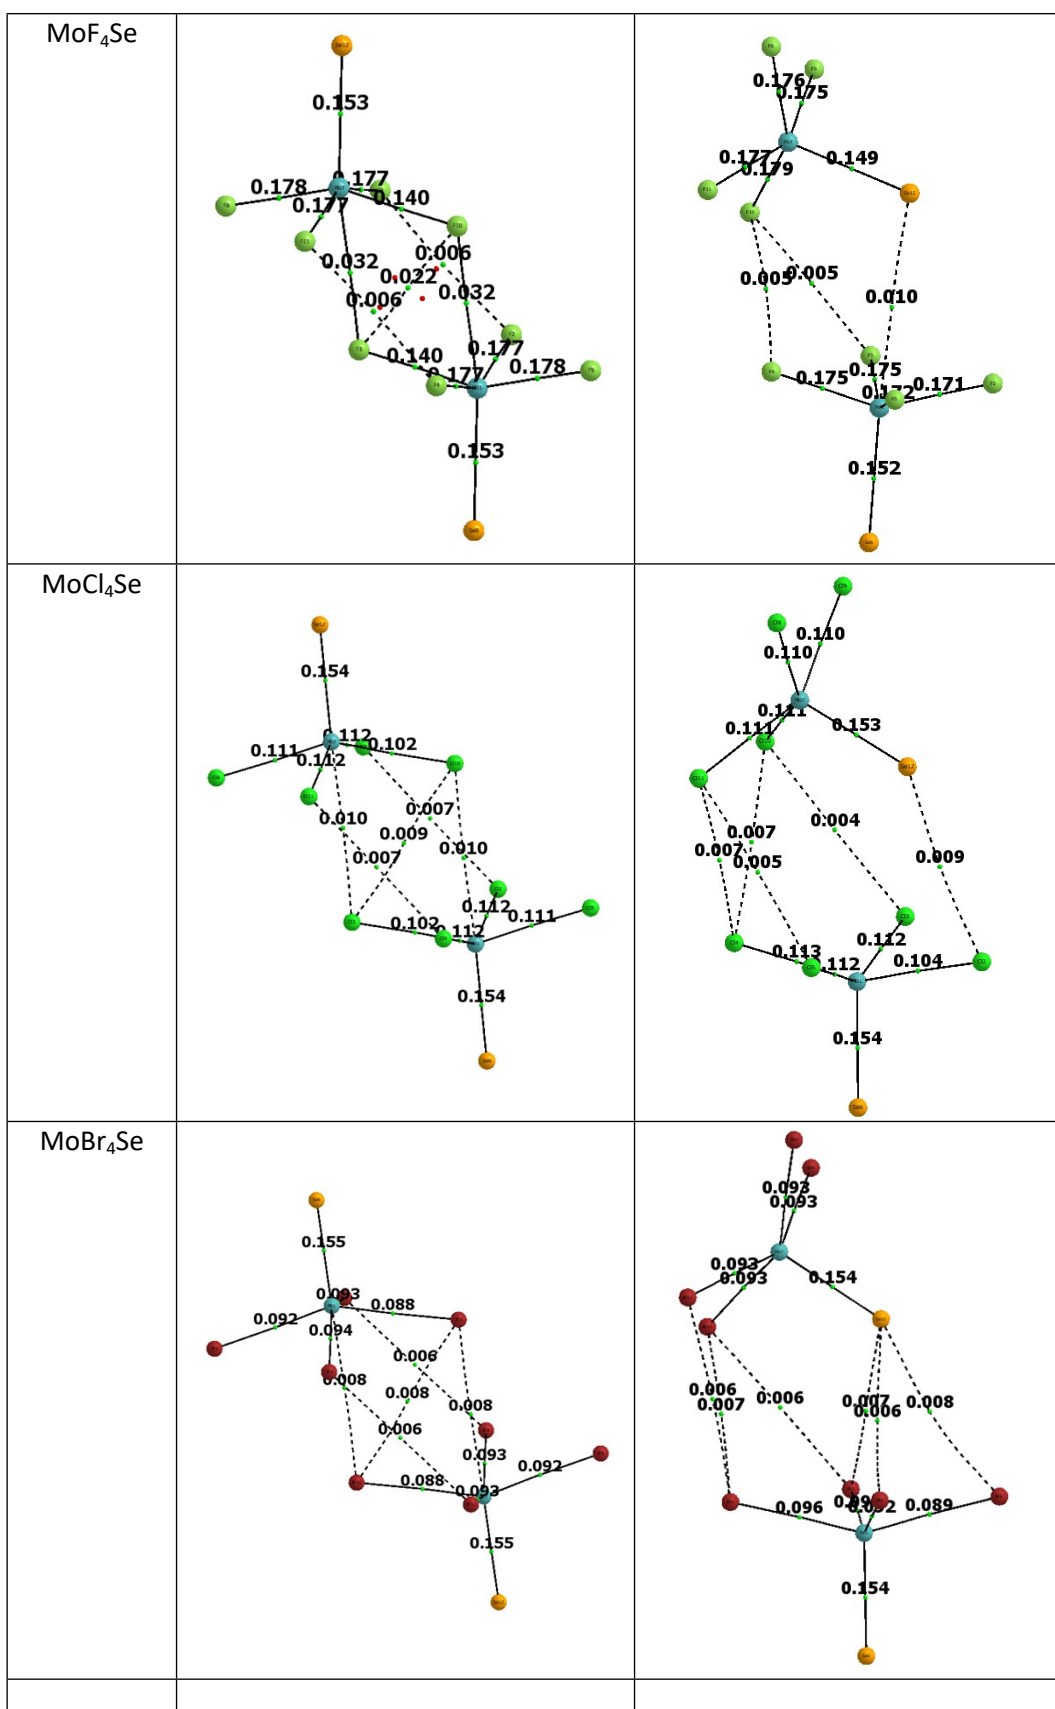

Figure S1. (continued)

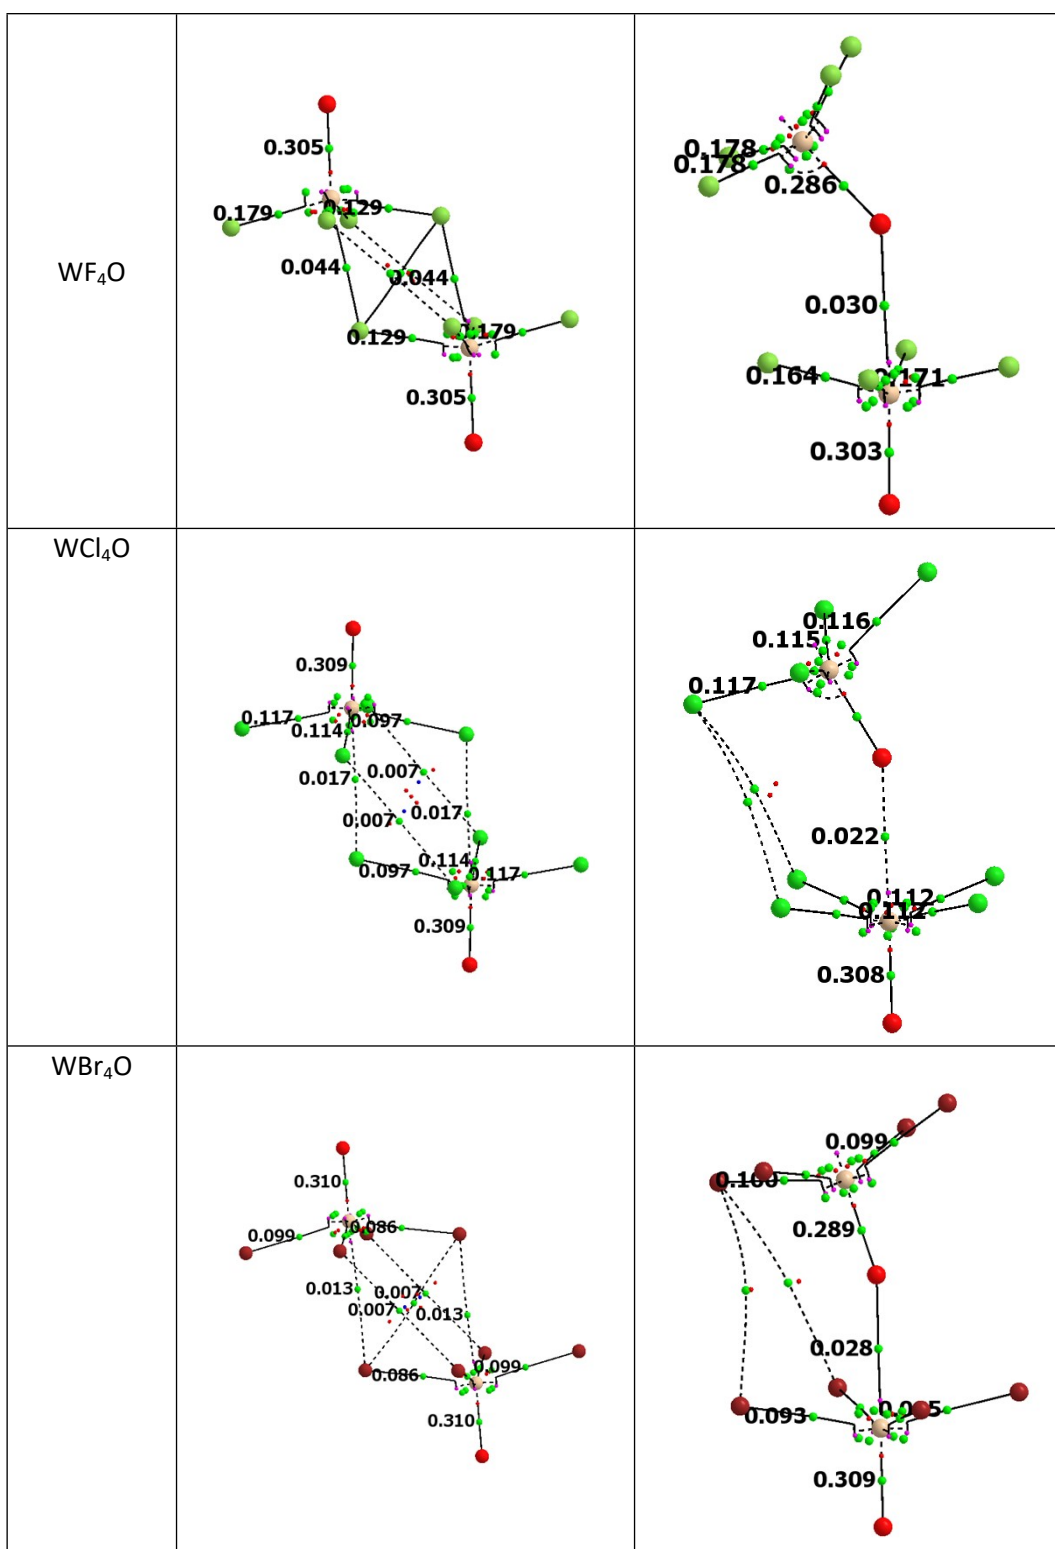

Figure S1. (continued)

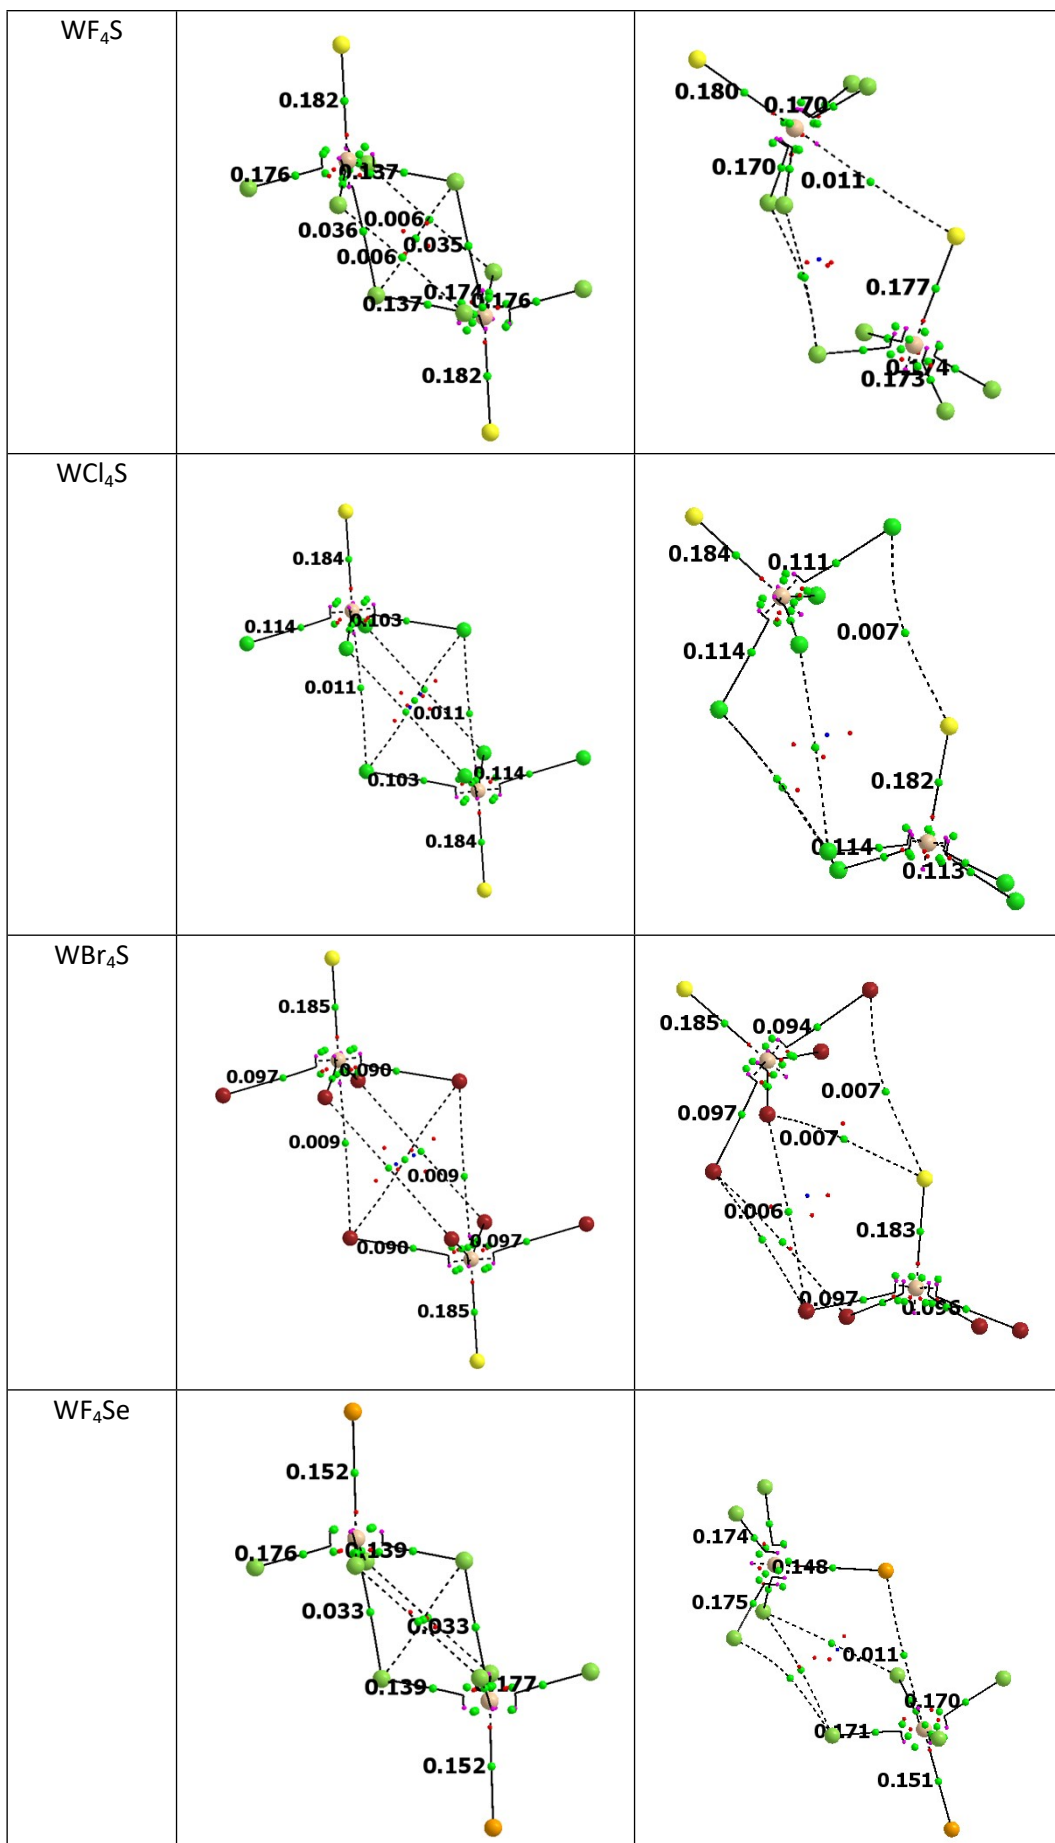

Figure S1. (continued)

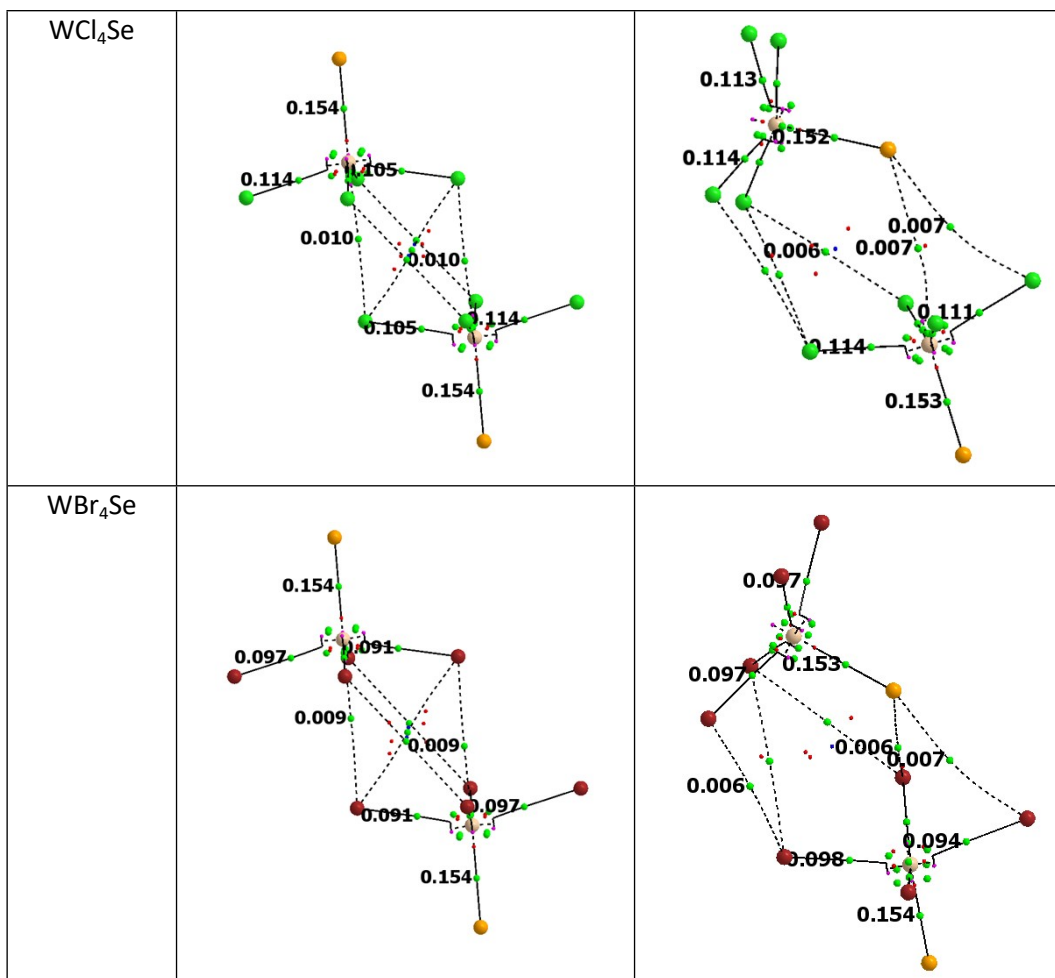

**Figure S2.** NCI molecular diagrams of four Mono-Y dimers. Blue isosurfaces represent areas of strong noncovalent contacts, while green and red correspond to weaker contacts and repulsions, respectively. RDG surface shown is 0.05 au of electron density and blue and red colors refer specifically to  $\rho * \text{sign}(\lambda_2)$ .

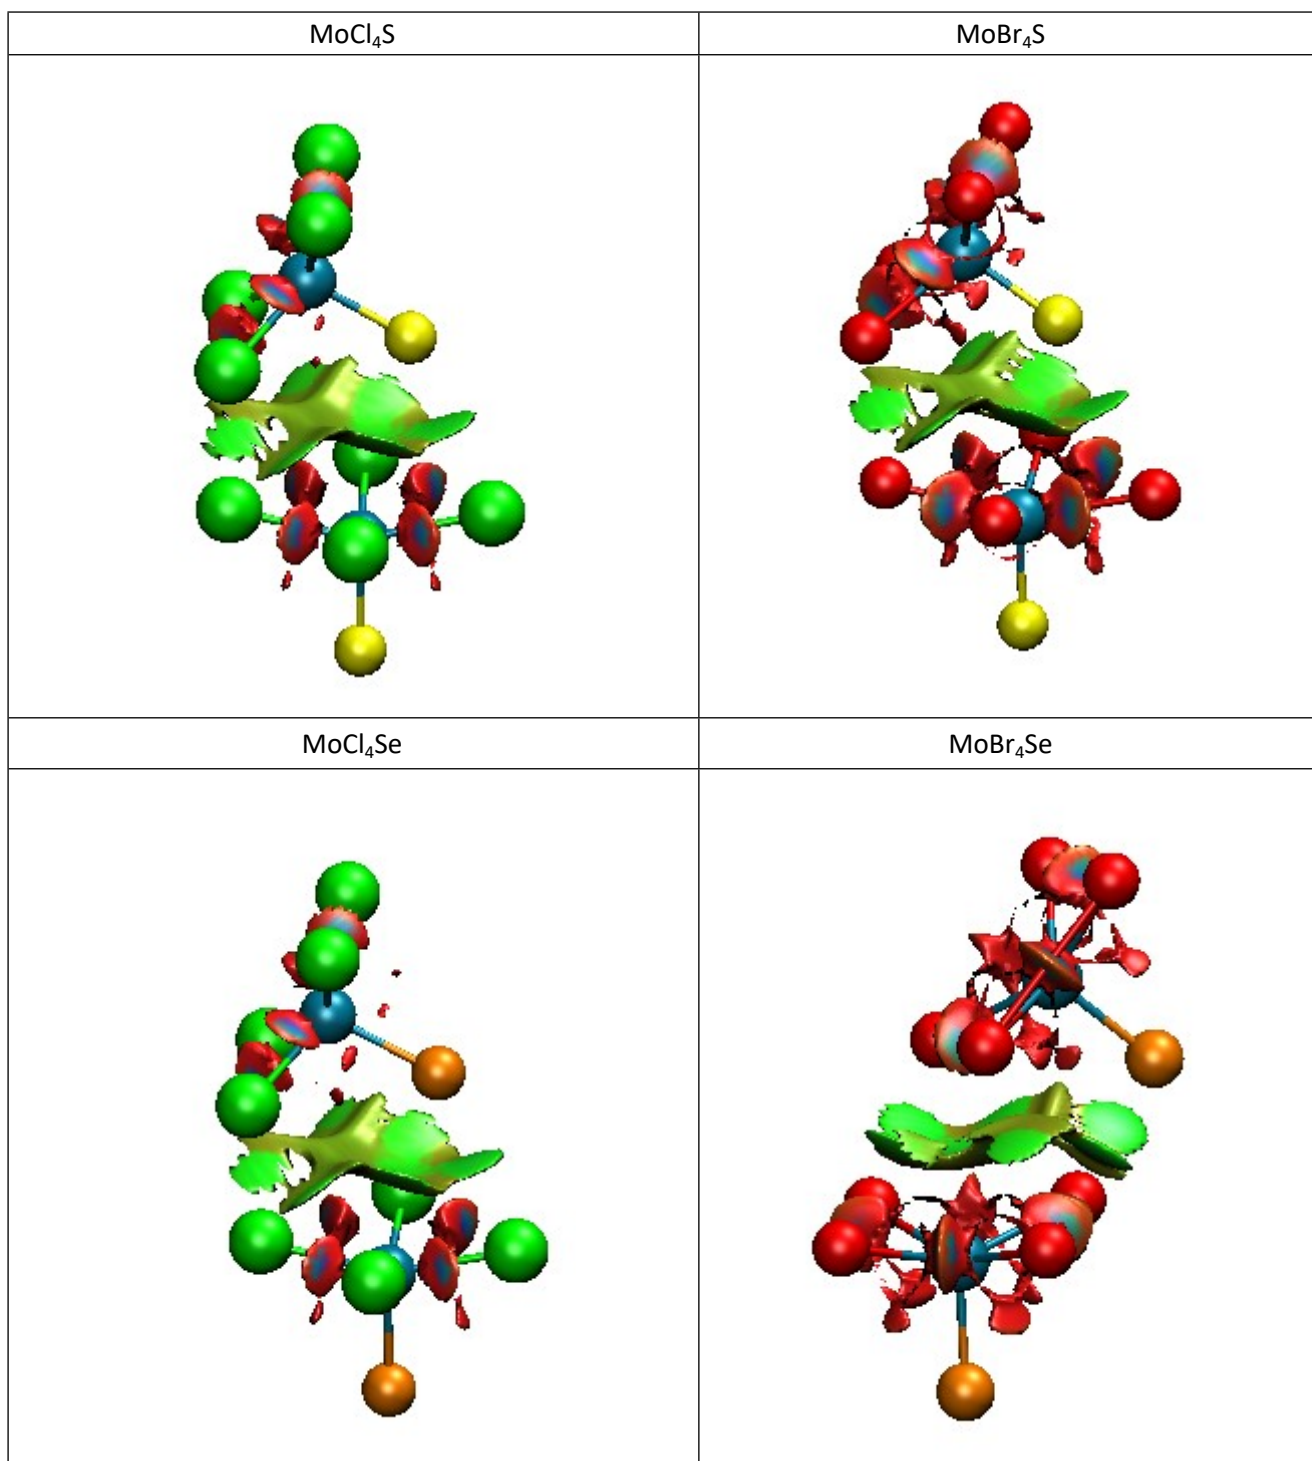



**Figure S3.** Geometry of Lin-Y and Mono-X conformers

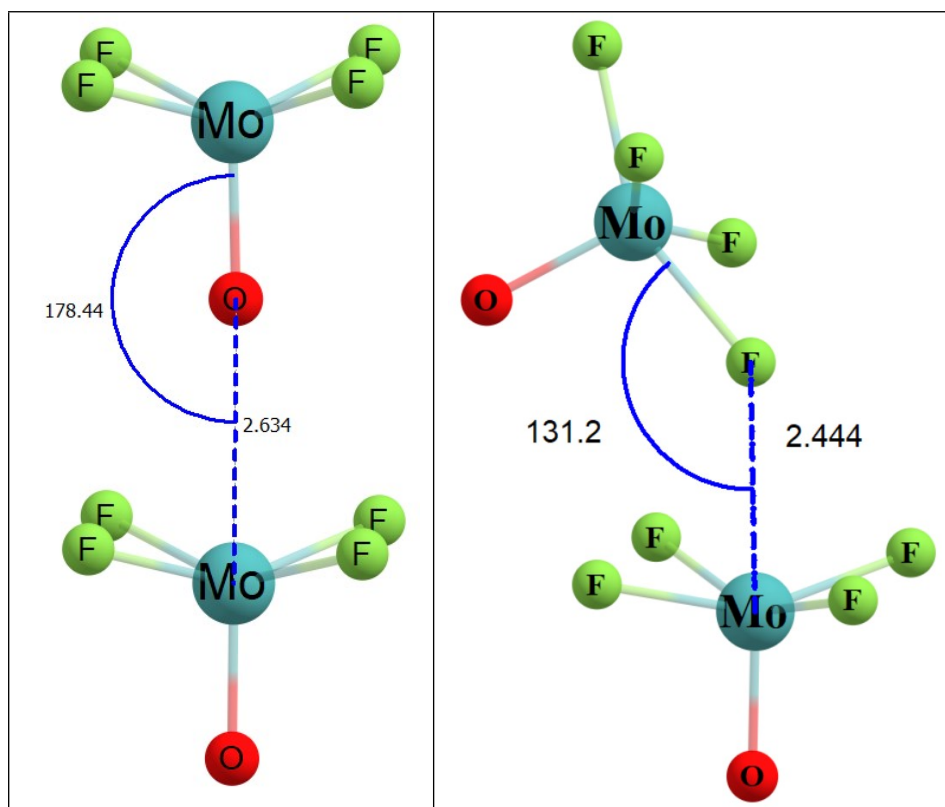

**Table S1.** Intermolecular distances (Å) and interaction energies (kcal/mol) for alternate homodimers.

| homodimer                           | Lin-Y    |                  | Mono-X   |                  |
|-------------------------------------|----------|------------------|----------|------------------|
|                                     | R(M...Y) | $E_{\text{int}}$ | R(M...X) | $E_{\text{int}}$ |
| (MoF <sub>4</sub> O) <sub>2</sub>   | 2.634    | -5.26            | 2.444    | -11.86           |
| (MoCl <sub>4</sub> O) <sub>2</sub>  | 2.775    | -5.09            | 3.324    | -6.38            |
| (MoBr <sub>4</sub> O) <sub>2</sub>  | 2.664    | -6.00            | 3.548    | -6.70            |
| (MoF <sub>4</sub> S) <sub>2</sub>   | 3.517    | -0.46            | 2.484    | -11.68           |
| (MoCl <sub>4</sub> S) <sub>2</sub>  | -        | -                | 3.369    | -7.75            |
| (MoBr <sub>4</sub> S) <sub>2</sub>  | -        | -                | 3.595    | -8.38            |
| (MoF <sub>4</sub> Se) <sub>2</sub>  | 3.624    | -0.61            | 2.496    | -11.31           |
| (MoCl <sub>4</sub> Se) <sub>2</sub> | -        | -                | 3.379    | -7.86            |
| (MoBr <sub>4</sub> Se) <sub>2</sub> | -        | -                | 3.616    | -8.60            |
| (WF <sub>4</sub> O) <sub>2</sub>    | 2.530    | -9.30            | 2.450    | -11.94           |
| (WCl <sub>4</sub> O) <sub>2</sub>   | 2.623    | -7.87            | 3.345    | -6.34            |
| (WBr <sub>4</sub> O) <sub>2</sub>   | 2.550    | -8.77            | 3.559    | -6.67            |
| (WF <sub>4</sub> S) <sub>2</sub>    | -        | -                | 2.509    | -10.67           |
| (WCl <sub>4</sub> S) <sub>2</sub>   | -        | -                | 3.418    | -6.94            |
| (WBr <sub>4</sub> S) <sub>2</sub>   | -        | -                | 3.647    | -7.54            |
| (WF <sub>4</sub> Se) <sub>2</sub>   | -        | -                | 2.529    | -10.07           |
| (WCl <sub>4</sub> Se) <sub>2</sub>  | -        | -                | 3.440    | -6.92            |
| (WBr <sub>4</sub> Se) <sub>2</sub>  | -        | -                | 3.669    | -7.65            |

**Table S2.** Relative total electron energy of four types of homodimers obtained within this study calculated at M062X/def2TZVPP level of theory. In each case the most stable is the bridged complex so the values of other conformers are referred to the most stable one. Data are given in kcal/mol.

| homodimer                           | Dual-X | Mono-Y | Lin-Y  | Mono-X |
|-------------------------------------|--------|--------|--------|--------|
| (MoF <sub>4</sub> O) <sub>2</sub>   | 0.00   | 12.10  | 12.37  | 7.71   |
| (MoCl <sub>4</sub> O) <sub>2</sub>  | 0.00   | 4.78   | 5.33   | 5.18   |
| (MoBr <sub>4</sub> O) <sub>2</sub>  | 0.00   | 4.05   | 4.56   | 4.03   |
| (MoF <sub>4</sub> S) <sub>2</sub>   | 0.00   | 11.68  | 13.50  | 4.13   |
| (MoCl <sub>4</sub> S) <sub>2</sub>  | 0.00   | 3.98   | Mono-Y | 1.33   |
| (MoBr <sub>4</sub> S) <sub>2</sub>  | 0.00   | 3.32   | Mono-Y | 1.10   |
| (MoF <sub>4</sub> Se) <sub>2</sub>  | 0.00   | 10.28  | 12.22  | 3.43   |
| (MoCl <sub>4</sub> Se) <sub>2</sub> | 0.00   | 3.13   | Mono-Y | 0.79   |
| (MoBr <sub>4</sub> Se) <sub>2</sub> | 0.00   | 2.58   | Mono-Y | 0.49   |
|                                     |        |        |        |        |
| (WF <sub>4</sub> O) <sub>2</sub>    | 0.00   | 9.88   | 10.09  | 8.67   |
| (WCl <sub>4</sub> O) <sub>2</sub>   | 0.00   | 3.49   | 3.95   | 4.88   |
| (WBr <sub>4</sub> O) <sub>2</sub>   | 0.00   | 2.85   | 3.20   | 4.58   |
| (WF <sub>4</sub> S) <sub>2</sub>    | 0.00   | 11.11  | Mono-Y | 5.10   |
| (WCl <sub>4</sub> S) <sub>2</sub>   | 0.00   | 4.36   | Mono-Y | 2.04   |
| (WBr <sub>4</sub> S) <sub>2</sub>   | 0.00   | 4.07   | Mono-Y | 1.95   |
| (WF <sub>4</sub> Se) <sub>2</sub>   | 0.00   | 9.63   | Mono-Y | 5.07   |
| (WCl <sub>4</sub> Se) <sub>2</sub>  | 0.00   | 3.58   | Mono-Y | 1.61   |
| (WBr <sub>4</sub> Se) <sub>2</sub>  | 0.00   | 3.28   | Mono-Y | 1.45   |

**Figure S4.** Examples of neutral  $MX_4Y$  complexes drawn from the CSD database.

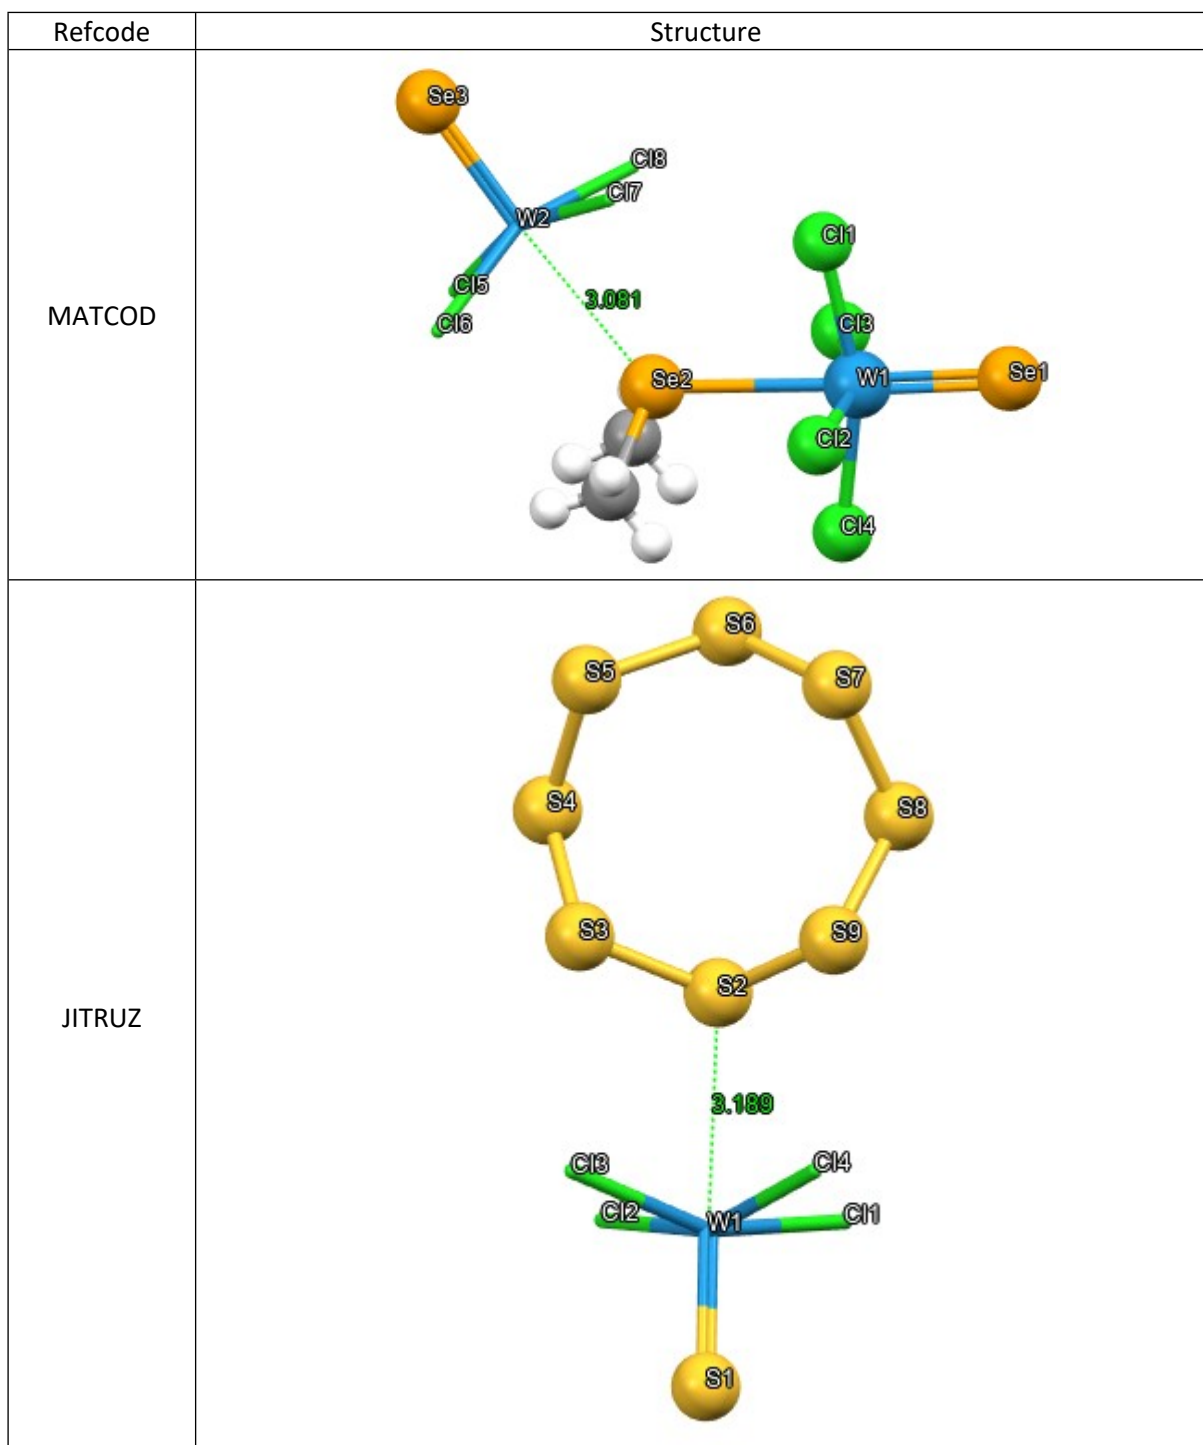

Figure S4. (continued)

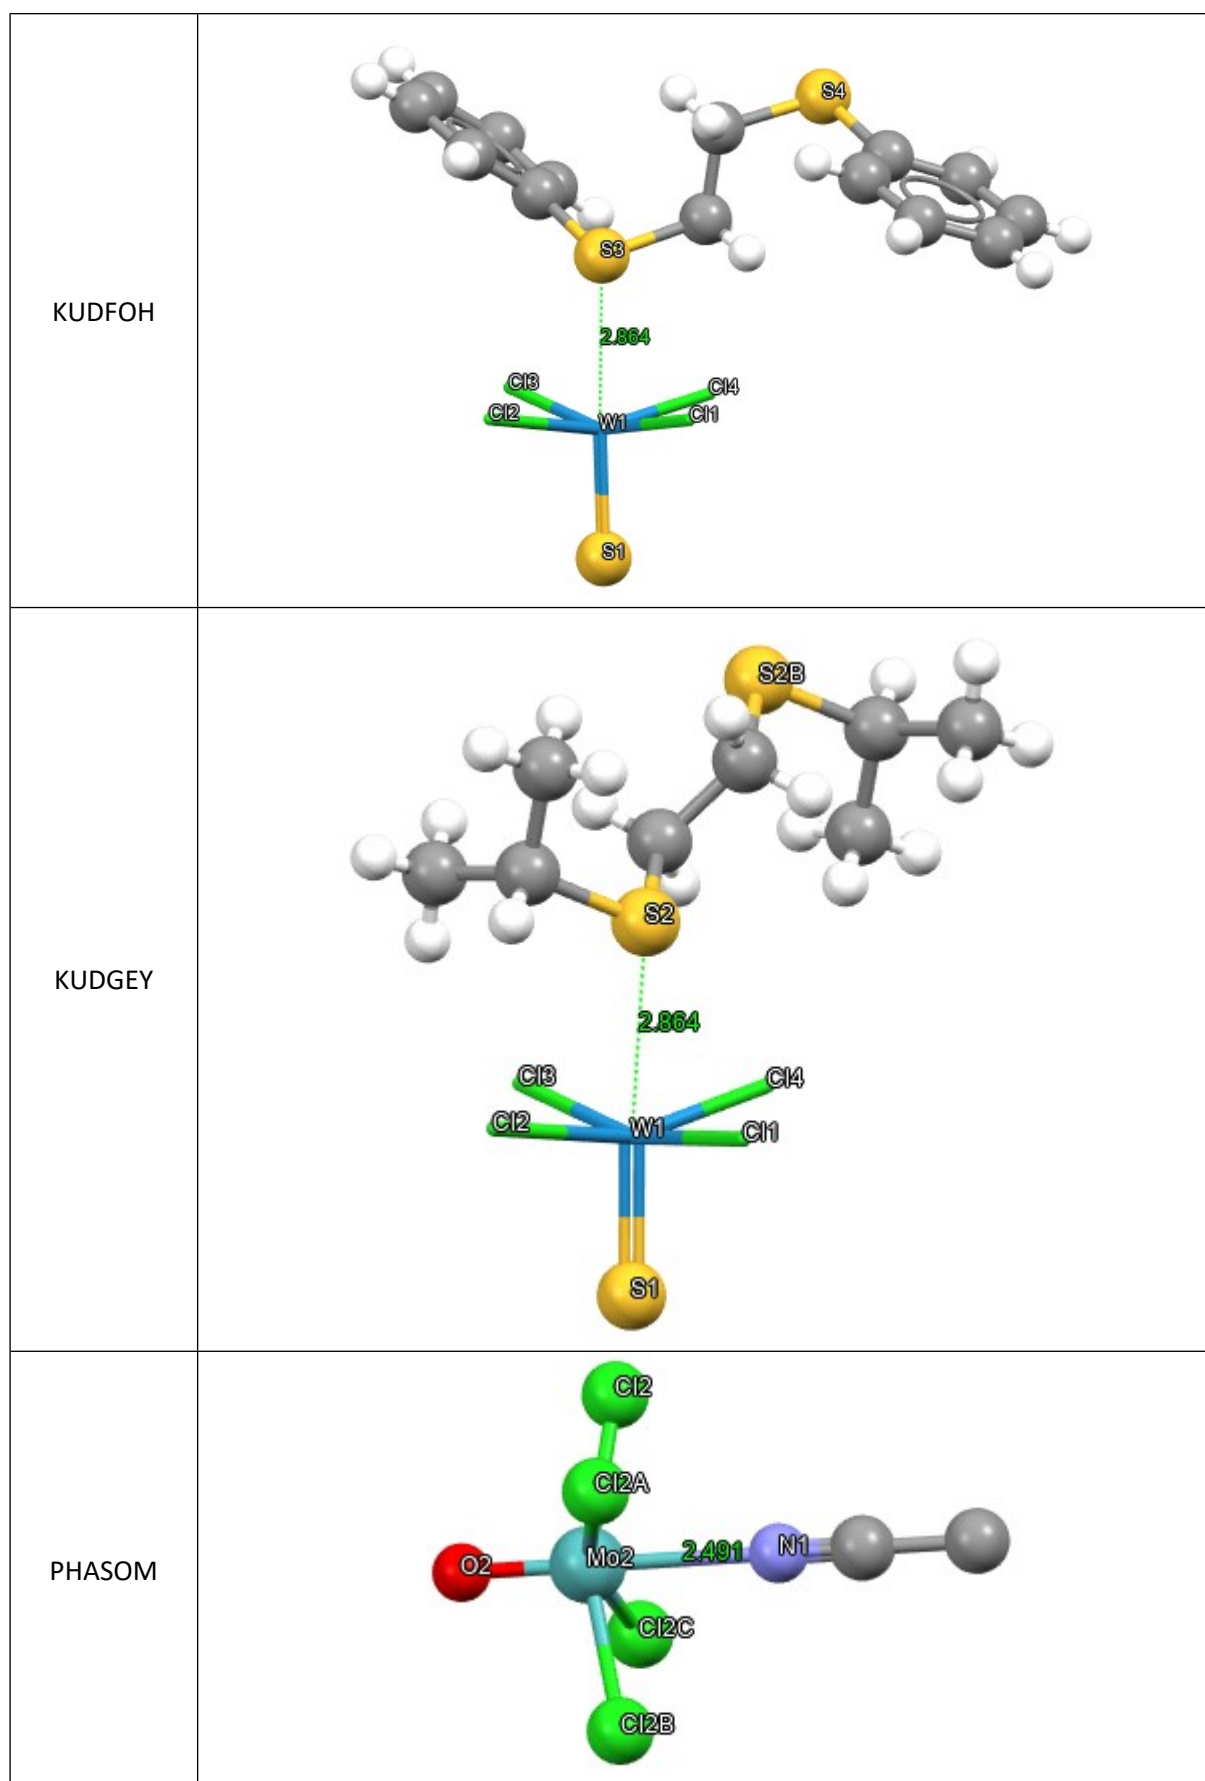

**Figure S5.** Examples of anionic homodimers of  $[\text{MoCl}_4\text{O}]^-$  drawn from the CSD database.

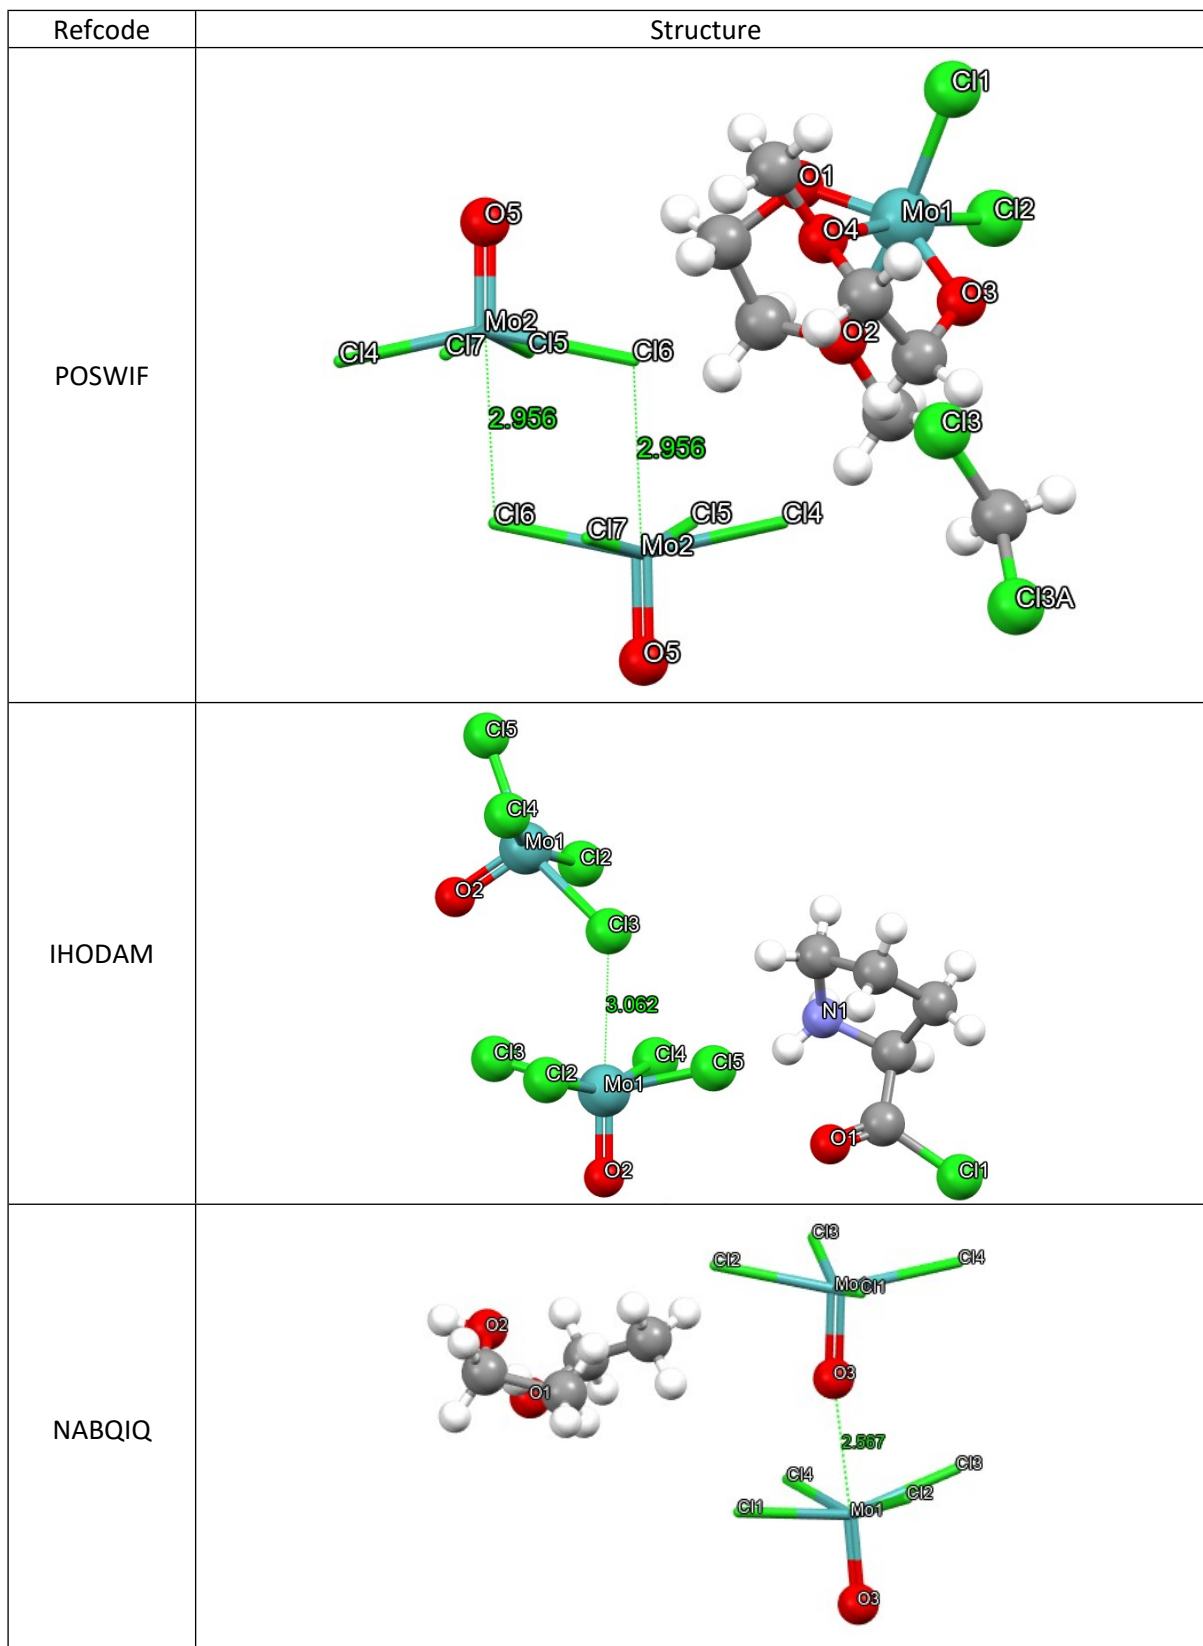

**Table S3.** Cartesian coordinates of monomers and dimers.

| monomer              | coordinates |             |             |             |
|----------------------|-------------|-------------|-------------|-------------|
| MoF <sub>4</sub> O   | Mo          | -0.39067200 | 1.02683800  | 0.38228700  |
|                      | O           | -0.39086200 | 1.02699500  | 2.00688600  |
|                      | F           | -2.15291000 | 1.02677700  | -0.11027000 |
|                      | F           | -0.39057800 | 2.78900900  | -0.11052400 |
|                      | F           | 1.37186400  | 1.02676300  | -0.10915600 |
|                      | F           | -0.39059300 | -0.73566800 | -0.10922200 |
| MoCl <sub>4</sub> O  | Mo          | -0.39077100 | 1.02697100  | 0.44108900  |
|                      | O           | -0.39096600 | 1.02723200  | 2.06258900  |
|                      | Cl          | -2.60047800 | 1.02661200  | -0.13882300 |
|                      | Cl          | -0.39047300 | 3.23645800  | -0.13964800 |
|                      | Cl          | 1.81941000  | 1.02659800  | -0.13752400 |
|                      | Cl          | -0.39047200 | -1.18315600 | -0.13768300 |
| MoBr <sub>4</sub> O  | Mo          | -0.39075500 | 1.02695200  | 0.46262200  |
|                      | O           | -0.39113500 | 1.02753200  | 2.08310600  |
|                      | Br          | -2.76744000 | 1.02649300  | -0.14957000 |
|                      | Br          | -0.39040500 | 3.40353300  | -0.14990600 |
|                      | Br          | 1.98639700  | 1.02649000  | -0.14829100 |
|                      | Br          | -0.39041100 | -1.35028600 | -0.14796000 |
| MoF <sub>4</sub> S   | Mo          | -0.39077300 | 1.02693400  | 0.32796500  |
|                      | F           | -2.15523300 | 1.02588500  | -0.17004700 |
|                      | F           | -0.38972400 | 2.79139300  | -0.17004700 |
|                      | F           | 1.37440300  | 1.02583700  | -0.16782300 |
|                      | F           | -0.38967600 | -0.73824200 | -0.16782300 |
|                      | S           | -0.39274700 | 1.02890800  | 2.37177400  |
| MoCl <sub>4</sub> S  | Mo          | -0.39074300 | 1.02693900  | 0.39350800  |
|                      | S           | -0.39250000 | 1.02894000  | 2.42740100  |
|                      | Cl          | -2.59931000 | 1.02621700  | -0.20110000 |
|                      | Cl          | -0.39017100 | 3.23505300  | -0.20240500 |
|                      | Cl          | 1.81909800  | 1.02625300  | -0.19651200 |
|                      | Cl          | -0.39012500 | -1.18268700 | -0.19689100 |
| MoBr <sub>4</sub> S  | Mo          | -0.39095300 | 1.02711300  | 0.41788200  |
|                      | Br          | -2.76460000 | 1.02646900  | -0.21274900 |
|                      | Br          | -0.39030900 | 3.40076000  | -0.21274900 |
|                      | Br          | 1.98415200  | 1.02642600  | -0.20860300 |
|                      | Br          | -0.39026600 | -1.34799100 | -0.20860300 |
|                      | S           | -0.39177500 | 1.02793600  | 2.44882100  |
| MoF <sub>4</sub> Se  | Mo          | -0.39064300 | 1.02680700  | 0.32758200  |
|                      | Se          | -0.39263500 | 1.02898600  | 2.51461700  |
|                      | F           | -2.15456700 | 1.02625600  | -0.17081100 |
|                      | F           | -0.39016700 | 2.79026500  | -0.17206800 |
|                      | F           | 1.37438700  | 1.02629200  | -0.16687100 |
|                      | F           | -0.39012500 | -0.73789200 | -0.16764900 |
| MoCl <sub>4</sub> Se | Mo          | -0.39050700 | 1.02662400  | 0.39474600  |
|                      | Se          | -0.38874200 | 1.02459100  | 2.57193100  |
|                      | Cl          | 1.81628000  | 1.02734500  | -0.20223200 |
|                      | Cl          | -0.39107000 | -1.17947400 | -0.20402900 |
|                      | Cl          | -2.59860800 | 1.02730100  | -0.19747600 |
|                      | Cl          | -0.39110500 | 3.23432800  | -0.19814000 |
| MoBr <sub>4</sub> Se | Mo          | -0.39093400 | 1.02709400  | 0.42051900  |

**Table S3. (continued)**

|                     |    |             |             |             |
|---------------------|----|-------------|-------------|-------------|
|                     | Br | -2.76182900 | 1.02649300  | -0.21469400 |
|                     | Br | -0.39033200 | 3.39799000  | -0.21469400 |
|                     | Br | 1.98141700  | 1.02645500  | -0.21050800 |
|                     | Br | -0.39029400 | -1.34525600 | -0.21050800 |
|                     | Se | -0.39177800 | 1.02793900  | 2.59468400  |
|                     |    |             |             |             |
| WF <sub>4</sub> O   | W  | -0.39066500 | 1.02682900  | 0.37908000  |
|                     | O  | -0.39093100 | 1.02712800  | 2.03728300  |
|                     | F  | -2.16840500 | 1.02678700  | -0.11669000 |
|                     | F  | -0.39058700 | 2.80412500  | -0.11820800 |
|                     | F  | 1.38743900  | 1.02677300  | -0.11520900 |
|                     | F  | -0.39060300 | -0.75092800 | -0.11625600 |
| WCl <sub>4</sub> O  | W  | -0.39087000 | 1.02697600  | 0.43144800  |
|                     | O  | -0.39118600 | 1.02675400  | 2.08427200  |
|                     | Cl | -2.61266100 | 1.02686400  | -0.14219300 |
|                     | Cl | -0.39050100 | 3.24884200  | -0.14229700 |
|                     | Cl | 1.83183700  | 1.02661500  | -0.13995900 |
|                     | Cl | -0.39037000 | -1.19533700 | -0.14127100 |
| WBr <sub>4</sub> O  | W  | -0.39084200 | 1.02694900  | 0.45074800  |
|                     | O  | -0.39146000 | 1.02708400  | 2.10206000  |
|                     | Br | -2.77861700 | 1.02662100  | -0.15200700 |
|                     | Br | -0.39024000 | 3.41503800  | -0.15112300 |
|                     | Br | 1.99779700  | 1.02664900  | -0.14960000 |
|                     | Br | -0.39038800 | -1.36162600 | -0.15007800 |
| WF <sub>4</sub> S   | W  | -0.39057100 | 1.02673100  | 0.33134700  |
|                     | F  | -2.16401100 | 1.02626900  | -0.18044300 |
|                     | F  | -0.39010800 | 2.80017200  | -0.18044300 |
|                     | F  | 1.38364800  | 1.02614700  | -0.17774000 |
|                     | F  | -0.38998600 | -0.74748800 | -0.17774000 |
|                     | S  | -0.39272300 | 1.02888300  | 2.40901800  |
| WCl <sub>4</sub> S  | W  | -0.39071200 | 1.02689700  | 0.39124500  |
|                     | S  | -0.39271700 | 1.02924800  | 2.45777300  |
|                     | Cl | -2.60696800 | 1.02615400  | -0.20849100 |
|                     | Cl | -0.39013500 | 3.24282200  | -0.20935900 |
|                     | Cl | 1.82683900  | 1.02616700  | -0.20367200 |
|                     | Cl | -0.39005600 | -1.19057400 | -0.20349500 |
| WBr <sub>4</sub> S  | W  | -0.39144400 | 1.02760400  | 0.41334500  |
|                     | Br | -2.77217100 | 1.02565900  | -0.21802600 |
|                     | Br | -0.38949900 | 3.40833200  | -0.21802600 |
|                     | Br | 1.99168800  | 1.02607500  | -0.21489600 |
|                     | Br | -0.38991500 | -1.35552700 | -0.21489600 |
|                     | S  | -0.39241000 | 1.02857100  | 2.47649800  |
| WF <sub>4</sub> Se  | W  | -0.39061100 | 1.02676500  | 0.33190800  |
|                     | Se | -0.39309200 | 1.02967000  | 2.55223600  |
|                     | F  | -2.16223700 | 1.02607200  | -0.18176600 |
|                     | F  | -0.39005400 | 2.79811700  | -0.18255400 |
|                     | F  | 1.38225200  | 1.02611600  | -0.17746900 |
|                     | F  | -0.39000900 | -0.74602700 | -0.17755600 |
| WCl <sub>4</sub> Se | W  | -0.39055500 | 1.02669600  | 0.39334900  |
|                     | Se | -0.38837800 | 1.02412100  | 2.60199100  |
|                     | Cl | 1.82323000  | 1.02746000  | -0.20996500 |
|                     | Cl | -0.39114800 | -1.18678400 | -0.21076400 |
|                     | Cl | -2.60566800 | 1.02744200  | -0.20505700 |
|                     | Cl | -0.39123100 | 3.24178000  | -0.20475500 |

**Table S3. (continued)**

|    |             |             |             |
|----|-------------|-------------|-------------|
| W  | -0.39139300 | 1.02755300  | 0.41642500  |
| Br | -2.76912200 | 1.02586600  | -0.21994600 |
| Br | -0.38970600 | 3.40528300  | -0.21994600 |
| Br | 1.98866400  | 1.02610900  | -0.21656400 |
| Br | -0.38994900 | -1.35250300 | -0.21656400 |
| Se | -0.39224400 | 1.02840500  | 2.62139600  |



**Table S3. (continued)**

| homodimer           | Lin-Y       |             |             | Dual-X      |             |             | Mono-Y      |             |             |             |             |             |
|---------------------|-------------|-------------|-------------|-------------|-------------|-------------|-------------|-------------|-------------|-------------|-------------|-------------|
| MoF <sub>4</sub> O  | Mo          | -0.38701600 | 1.02937800  | 0.46849300  | Mo          | -0.30861200 | 1.05659600  | 0.19268000  | Mo          | -0.34678600 | 1.02317800  | 0.52575000  |
|                     | O           | -0.41808700 | 1.01041300  | 2.09175300  | O           | -0.55357200 | 1.01144900  | 1.79377400  | O           | -0.16319100 | 0.99616000  | 2.13833500  |
|                     | F           | -2.15716700 | 1.03453400  | -0.01437800 | F           | -2.12993100 | 1.14559800  | -0.45929600 | F           | -2.17380400 | 1.06365600  | 0.28127000  |
|                     | F           | -0.37907300 | 2.81346600  | 0.04119100  | F           | -0.28848300 | 2.84993800  | -0.13305500 | F           | -0.38206900 | 2.80828300  | 0.10476900  |
|                     | F           | 1.40019400  | 1.03413900  | 0.05473800  | F           | 1.49655200  | 0.99519800  | 0.03124600  | F           | 1.36425900  | 1.00259100  | -0.12116200 |
|                     | F           | -0.37873800 | -0.74427700 | -0.00107600 | F           | -0.41818400 | -0.70828200 | -0.25110900 | F           | -0.44760700 | -0.74534300 | 0.05349900  |
|                     | Mo          | -0.35171400 | 1.05011300  | -3.80340800 | Mo          | -2.16051300 | 1.22667900  | -2.82288300 | Mo          | -2.06866600 | 1.25306500  | -3.08467800 |
|                     | O           | -0.34183700 | 1.05664600  | -2.16531600 | O           | -1.91656700 | 1.27106800  | -4.42425000 | O           | -0.77997800 | 1.08728700  | -2.08227500 |
|                     | F           | -2.10524200 | 1.04834100  | -4.29309500 | F           | -0.33920400 | 1.13780400  | -2.17062000 | F           | -3.12190900 | 2.54033800  | -2.35092300 |
|                     | F           | -0.35442800 | 2.79899800  | -4.30991000 | F           | -2.04976200 | 2.99160900  | -2.37953100 | F           | -1.59007400 | 2.52915000  | -4.29501300 |
| F                   | 1.39618800  | 1.04832500  | -4.31339000 | F           | -3.96549200 | 1.28909900  | -2.66000500 | F           | -1.78341200 | 0.07288400  | -4.44387900 |             |
| F                   | -0.35437500 | -0.70250300 | -4.29646900 | F           | -2.18021100 | -0.56651500 | -2.49633900 | F           | -3.32074000 | 0.06899100  | -2.50508000 |             |
| MoCl <sub>4</sub> O | Mo          | -0.40553100 | 1.01189500  | 0.55258400  | Mo          | -0.18560700 | 1.04052300  | 0.58961000  | Mo          | -0.27065000 | 1.01852400  | 0.70356200  |
|                     | O           | -0.60711800 | 0.81617600  | 2.14761600  | O           | -0.33814700 | 0.99444300  | 2.19994800  | O           | 0.13275200  | 1.09915400  | 2.27011100  |
|                     | Cl          | -2.55653600 | 1.06696900  | -0.24362700 | Cl          | -2.44752100 | 1.14697900  | -0.08157200 | Cl          | -2.56430300 | 0.92403900  | 0.76290900  |
|                     | Cl          | -0.38267400 | 3.28611000  | 0.29914700  | Cl          | -0.14263600 | 3.28091400  | 0.18322100  | Cl          | -0.51589700 | 3.21756200  | 0.10096300  |
|                     | Cl          | 1.86955000  | 1.06929600  | 0.31446000  | Cl          | 2.05978500  | 0.96863000  | 0.26576200  | Cl          | 1.75106400  | 1.07285700  | -0.36112200 |
|                     | Cl          | -0.31263800 | -1.14080600 | -0.23421200 | Cl          | -0.30683600 | -1.16656700 | 0.04177300  | Cl          | -0.31943500 | -1.22749100 | 0.27344500  |
|                     | Mo          | -0.32335800 | 1.07794500  | -3.78668500 | Mo          | -2.28324900 | 1.24285900  | -3.21911900 | Mo          | -2.09508600 | 1.24267400  | -3.17553300 |
|                     | O           | -0.08939500 | 1.31768400  | -2.18690900 | O           | -2.13108600 | 1.28856900  | -4.82952100 | O           | -0.99873100 | 0.90794400  | -2.01067600 |
|                     | Cl          | -2.58369500 | 1.00628200  | -4.03068900 | Cl          | -0.02198200 | 1.13512800  | -2.54842700 | Cl          | -3.37348900 | 2.91530400  | -2.31836800 |
|                     | Cl          | -0.43993000 | 3.17201000  | -4.67646800 | Cl          | -2.16070800 | 3.45003500  | -2.67286300 | Cl          | -1.09649200 | 2.85440100  | -4.44061500 |
| Cl                  | 1.77240000  | 0.97827700  | -4.67470400 | Cl          | -4.52827000 | 1.31654500  | -2.89470000 | Cl          | -1.62157000 | -0.18695800 | -4.88495100 |             |
| Cl                  | -0.37237100 | -1.18426600 | -4.02138000 | Cl          | -2.32772100 | -0.99781600 | -2.81350000 | Cl          | -3.84214200 | -0.13777100 | -2.69911100 |             |
| MoBr <sub>4</sub> O | Mo          | -0.38951800 | 1.02750000  | 0.54208700  | Mo          | -0.12469000 | 1.03543500  | 0.73010600  | Mo          | -0.24643500 | 1.03537500  | 0.71717500  |
|                     | O           | -0.43971200 | 0.98110300  | 2.15889900  | O           | -0.26300300 | 0.99049700  | 2.34090200  | O           | 0.25575600  | 1.12710600  | 2.25283700  |
|                     | Br          | -2.77875200 | 1.03725300  | -0.06899700 | Br          | -2.54599700 | 1.14935000  | 0.03672800  | Br          | -2.70133000 | 1.00721200  | 0.95873300  |
|                     | Br          | -0.37961900 | 3.44512100  | 0.07320300  | Br          | -0.06700300 | 3.44361700  | 0.29966800  | Br          | -0.47212400 | 3.40462800  | 0.07458800  |
|                     | Br          | 2.02922100  | 1.03779300  | 0.07842600  | Br          | 2.28963800  | 0.95478500  | 0.36108300  | Br          | 1.86194500  | 1.01753000  | -0.54608500 |
|                     | Br          | -0.37524100 | -1.36405300 | -0.06245900 | Br          | -0.24934400 | -1.33864200 | 0.15092400  | Br          | -0.38437100 | -1.38791000 | 0.31935900  |
|                     | Mo          | -0.34742800 | 1.05457400  | -3.75394300 | Mo          | -2.34404700 | 1.24779500  | -3.35964600 | Mo          | -2.10778500 | 1.21954100  | -3.16513100 |
|                     | O           | -0.31419700 | 1.09653100  | -2.12033300 | O           | -2.20630300 | 1.29275300  | -4.97048300 | O           | -1.12380000 | 0.89114800  | -1.90321700 |
|                     | Br          | -2.73043600 | 1.03967400  | -4.29316900 | Br          | 0.07737900  | 1.13393500  | -2.66790500 | Br          | -3.58042900 | 2.99528300  | -2.36312100 |
|                     | Br          | -0.36132300 | 3.41040500  | -4.41285300 | Br          | -2.21903500 | 3.62222600  | -2.78102900 | Br          | -0.89791600 | 2.97650600  | -4.36576400 |
| Br                  | 2.01209500  | 1.04194700  | -4.39823200 | Br          | -4.75855800 | 1.32896100  | -2.99017300 | Br          | -1.42455200 | -0.28957000 | -4.96299400 |             |
| Br                  | -0.35638600 | -1.33027400 | -4.28349700 | Br          | -2.40301400 | -1.16047300 | -2.92956300 | Br          | -3.99293500 | -0.29660700 | -2.79576700 |             |
| MoF <sub>4</sub> S  | Mo          | -0.42677700 | 1.27182500  | 2.37432000  | Mo          | -0.43835600 | 1.39065600  | 0.31599600  | Mo          | -0.32810300 | 1.31771100  | 1.18427400  |
|                     | F           | -2.19505600 | 1.27808400  | 1.88385200  | F           | -2.21960000 | 1.37634900  | -0.09222500 | F           | -1.92280800 | 0.67497700  | 0.53156400  |

**Table S3. (continued)**

|                     |    |             |             |             |            |             |             |             |            |             |             |             |            |
|---------------------|----|-------------|-------------|-------------|------------|-------------|-------------|-------------|------------|-------------|-------------|-------------|------------|
|                     | F  | -0.43050500 | 3.04351800  | 1.89753100  | F          | -0.44154200 | 3.20417200  | 0.11801800  | F          | -1.03263100 | 2.98350700  | 0.88661300  |            |
|                     | F  | 1.33413700  | 1.27854800  | 1.85849300  | F          | 1.33632300  | 1.37959800  | -0.12011500 | F          | 1.30908500  | 2.07521000  | 0.85523400  |            |
|                     | F  | -0.43035000 | -0.48551200 | 1.84516300  | F          | -0.44175300 | -0.41762400 | -0.32940200 | F          | 0.40086000  | -0.22957600 | 0.51136100  |            |
|                     | S  | -0.41190400 | 1.24114500  | 4.41613400  | S          | -0.42233100 | 1.11759800  | 2.33798800  | S          | -0.41082500 | 1.04475100  | 3.20674400  |            |
|                     | Mo | -0.45478400 | 1.43021200  | -3.18276000 | Mo         | -0.46092900 | -0.46917400 | -2.77434700 | Mo         | 0.97637400  | 3.25672700  | -2.52253900 |            |
|                     | F  | -2.21577900 | 1.46002700  | -3.68467300 | F          | -0.45755900 | 1.33924200  | -2.12883000 | F          | 1.70852400  | 3.00190600  | -4.18042400 |            |
|                     | F  | -0.45512300 | 3.22058300  | -3.56731600 | F          | -2.23557600 | -0.45784100 | -2.33826300 | F          | -0.08090800 | 4.50397200  | -3.35019700 |            |
|                     | F  | 1.30755100  | 1.46169500  | -3.67972600 | F          | -0.45765600 | -2.28260000 | -2.57592900 | F          | 0.83629800  | 4.31647100  | -1.04386600 |            |
|                     | F  | -0.45317800 | -0.29740500 | -3.79158700 | F          | 1.32029200  | -0.45444400 | -2.36617300 | F          | 2.62013300  | 2.78408700  | -1.87640600 |            |
|                     | S  | -0.45787100 | 1.29743700  | -1.14220200 | S          | -0.47697600 | -0.19644300 | -4.79634400 | S          | -0.24441600 | 1.63506600  | -2.20524500 |            |
| MoCl <sub>4</sub> S |    |             |             |             | Mo         | -0.43526900 | 1.49891100  | 0.76069300  | Mo         | -0.30917200 | 1.22993900  | 1.46209100  |            |
|                     |    |             |             |             | Cl         | -2.65572200 | 1.49470500  | 0.23525900  | Cl         | -2.12114200 | 0.29726500  | 0.37088000  |            |
|                     |    |             |             |             | Cl         | -0.44067400 | 3.74618600  | 0.35835700  | Cl         | -1.46261200 | 3.19517000  | 1.32720000  |            |
|                     |    |             |             |             | Cl         | 1.77646900  | 1.49904100  | 0.19941500  | Cl         | 1.58054900  | 2.49409000  | 1.58892500  |            |
|                     |    |             |             |             | Cl         | -0.43827000 | -0.73486600 | 0.09438300  | Cl         | 0.94345200  | -0.29803700 | 0.31872900  |            |
|                     |    |             |             |             | S          | -0.41886400 | 1.36075600  | 2.78752300  | S          | -0.52674700 | 0.53339500  | 3.35984900  |            |
|                     |    |             |             |             | Mo         | -0.46391500 | -0.57774400 | -3.21969700 | Mo         | 0.91524300  | 3.28826300  | -2.72521000 |            |
|                     |    |             |             |             | Cl         | -0.46151200 | 1.65750100  | -2.55342800 | Cl         | 1.71821000  | 2.47053500  | -4.70621900 |            |
|                     |    |             |             |             | Cl         | -2.67494900 | -0.57772500 | -2.65627900 | Cl         | -0.00201200 | 4.97153600  | -3.97528800 |            |
|                     |    |             |             |             | Cl         | -0.45858700 | -2.82557400 | -2.81857700 | Cl         | 1.00890700  | 4.80855300  | -1.02213900 |            |
| MoBr <sub>4</sub> S |    |             |             |             | Cl         | 1.75536600  | -0.57254600 | -2.69079900 | Cl         | 2.73356800  | 2.30113300  | -1.75589800 |            |
|                     |    |             |             |             | S          | -0.47973500 | -0.43915900 | -5.24647800 | S          | -0.64666000 | 2.07296600  | -2.24580900 |            |
|                     |    |             |             |             | Mo         | -0.43429900 | 1.55544800  | 0.90888400  | Mo         | -0.35662900 | 1.17734000  | 1.55126400  |            |
|                     |    |             |             |             | Br         | -2.81921600 | 1.56204300  | 0.34312600  | Br         | -2.31907000 | 0.20781200  | 0.37504400  |            |
|                     |    |             |             |             | Br         | -0.44010000 | 3.97118000  | 0.45567700  | Br         | -1.57689600 | 3.29914100  | 1.44786900  |            |
|                     |    |             |             |             | Br         | 1.94180100  | 1.56734200  | 0.30593100  | Br         | 1.68220300  | 2.50842300  | 1.76190400  |            |
|                     |    |             |             |             | Br         | -0.43636400 | -0.83551800 | 0.21664100  | Br         | 0.97565200  | -0.41989300 | 0.25513700  |            |
|                     |    |             |             |             | S          | -0.41838400 | 1.43533200  | 2.93385400  | S          | -0.58291800 | 0.42238300  | 3.42269500  |            |
|                     |    |             |             |             | Mo         | -0.46506900 | -0.63389000 | -3.36652900 | Mo         | 0.94750800  | 3.31919000  | -2.77999400 |            |
|                     |    |             |             |             | Br         | -0.46307100 | 1.75644800  | -2.67510400 | Br         | 1.68551200  | 2.35282800  | -4.91584000 |            |
| MoF <sub>4</sub> Se |    |             |             |             | Br         | -2.84113000 | -0.64606300 | -2.76472800 | Br         | -0.15323100 | 5.05057600  | -4.13504200 |            |
|                     |    |             |             |             | Br         | -0.45886400 | -3.04974300 | -2.91337400 | Br         | 1.13345500  | 5.02759000  | -1.03005500 |            |
|                     |    |             |             |             | Br         | 1.92000100  | -0.64020600 | -2.80253900 | Br         | 2.95860900  | 2.30497600  | -1.80665400 |            |
|                     |    |             |             |             | S          | -0.48096700 | -0.51288500 | -5.39146500 | S          | -0.56261200 | 2.11444100  | -2.14921600 |            |
|                     |    | Mo          | -0.41738900 | 1.03864500  | 1.13187500 | Mo          | -0.37681100 | 1.18364700  | 0.74010100 | Mo          | -0.33191800 | 1.30823900  | 1.20248100 |
|                     |    | F           | -2.15994000 | 1.02217200  | 0.55838000 | F           | -2.11625100 | 1.25899800  | 0.18648200 | F           | -1.92956800 | 0.65996600  | 0.55891700 |
|                     |    | F           | -0.40365000 | 2.79272000  | 0.59331700 | F           | -0.33921700 | 3.05835600  | 0.35542400 | F           | -1.03296800 | 2.97102000  | 0.88457600 |
|                     | F  | 1.36619500  | 1.03756600  | 0.70037100  | F          | 1.42609700  | 1.24561600  | 0.45119400  | F          | 1.30852300  | 2.05406600  | 0.86982400  |            |
|                     | F  | -0.39039300 | -0.73509100 | 0.66353600  | F          | -0.35033000 | -0.58184200 | 0.28030600  | F          | 0.39049200  | -0.25213400 | 0.55210800  |            |
|                     | Se | -0.50636700 | 1.08201100  | 3.31460600  | Se         | -0.53956500 | 1.16132000  | 2.91721100  | Se         | -0.42516200 | 1.04521900  | 3.37038100  |            |
|                     | Mo | -0.19187000 | 0.88645400  | -4.67015800 | Mo         | -0.15647000 | 3.45913200  | -2.07864500 | Mo         | 0.99740300  | 3.28932900  | -2.56903100 |            |

**Table S3. (continued)**

|                      |                                        |                                       |                                       |
|----------------------|----------------------------------------|---------------------------------------|---------------------------------------|
|                      | F -1.94789700 0.86421200 -5.19221900   | F -0.18518700 5.22299400 -1.61248900  | F 1.75215800 3.08666000 -4.22386200   |
|                      | F -0.18657700 2.62709900 -5.24109200   | F -1.96013800 3.39475000 -1.79210400  | F -0.04123300 4.57013500 -3.36855600  |
|                      | F 1.57674700 0.86827600 -5.14518300    | F -0.19273900 1.58375900 -1.69694100  | F 0.83586500 4.29504400 -1.05513800   |
|                      | F -0.18414100 -0.89610000 -5.09189200  | F 1.58336900 3.38433400 -1.52649800   | F 2.62882100 2.78677000 -1.91365700   |
|                      | Se -0.22010500 0.98123500 -2.48624800  | Se 0.00674400 3.48788400 -4.25577300  | Se -0.32083000 1.55049300 -2.31093200 |
| MoCl <sub>4</sub> Se |                                        | Mo -0.40799100 1.02740600 1.17623600  | Mo -0.30992400 1.22719900 1.47405100  |
|                      |                                        | Cl -2.57102800 1.10446100 0.45753300  | Cl -2.13567500 0.26239000 0.42689500  |
|                      |                                        | Cl -0.37564700 3.32419600 0.82295400  | Cl -1.48171800 3.17879100 1.32531500  |
|                      |                                        | Cl 1.83780200 1.09386000 0.78708700   | Cl 1.56853000 2.50649100 1.55945200   |
|                      |                                        | Cl -0.36046200 -1.14230300 0.46281800 | Cl 0.93318400 -0.30059300 0.32413200  |
|                      |                                        | Se -0.56958100 0.87147700 3.33998100  | Se -0.50576500 0.50346700 3.51724100  |
|                      |                                        | Mo -0.12519900 3.61576500 -2.51495200 | Mo 0.93882900 3.31485500 -2.76543100  |
|                      |                                        | Cl -0.17286300 5.78500700 -1.80024600 | Cl 1.78268400 2.51796900 -4.73746000  |
|                      |                                        | Cl -2.37177900 3.55044300 -2.12791500 | Cl 0.06871200 5.02320600 -4.01442100  |
|                      |                                        | Cl -0.15938300 1.31922100 -2.16054200 | Cl 1.00310500 4.81087500 -1.04048600  |
|                      |                                        | Cl 2.03770400 3.53747500 -1.79609300  | Cl 2.72351300 2.29749900 -1.76679600  |
|                      |                                        | Se 0.03792600 3.77193900 -4.67859300  | Se -0.75389200 2.02266000 -2.30538000 |
| MoBr <sub>4</sub> Se |                                        | Mo -0.41796400 0.96069000 1.32314600  | Mo -0.43268900 1.11646200 1.57912400  |
|                      |                                        | Br -2.74419900 1.03582200 0.55819700  | Br -2.47221100 0.21350500 0.50048700  |
|                      |                                        | Br -0.37693700 3.41255400 0.94797900  | Br -1.47029000 3.31637900 1.28374100  |
|                      |                                        | Br 1.99404600 1.00991100 0.89914800   | Br 1.72138000 2.25529200 1.49469400   |
|                      |                                        | Br -0.37480700 -1.37037400 0.54152100 | Br 0.71110800 -0.80792100 0.55663800  |
|                      |                                        | Se -0.57444500 0.79433300 3.48338200  | Se -0.69071800 0.61382200 3.67738200  |
|                      |                                        | Mo -0.11534500 3.68267400 -2.66155600 | Mo 1.04343400 3.40513200 -2.83721200  |
|                      |                                        | Br -0.15912200 6.01305000 -1.87875300 | Br 1.78708600 2.61631800 -5.03989200  |
|                      |                                        | Br -2.52784000 3.63279500 -2.23912100 | Br -0.34763700 5.01769700 -4.05679900 |
|                      |                                        | Br -0.15645700 1.23069400 -2.28638200 | Br 1.07470700 5.05064000 -1.01715500  |
|                      |                                        | Br 2.21122300 3.60733400 -1.89755100  | Br 3.24172800 2.69124900 -2.01352000  |
|                      |                                        | Se 0.04134900 3.84946200 -4.82174000  | Se -0.33431500 1.87623200 -2.13037600 |
| WF <sub>4</sub> O    | Mo -0.24643500 1.03537500 0.71717500   | W -0.29677600 1.05596800 0.19704400   | W -0.34660400 1.02575000 0.48991900   |
|                      | O 0.25575600 1.12710600 2.25283700     | O -0.55449200 1.01058100 1.83019500   | O -0.13694300 0.99009000 2.13343300   |
|                      | Br -2.70133000 1.00721200 0.95873300   | F -2.12979600 1.14552600 -0.46971100  | F -2.19892700 1.08545600 0.29560700   |
|                      | Br -0.47212400 3.40462800 0.07458800   | F -0.27299600 2.86578900 -0.13247700  | F -0.37069100 2.83636900 0.10120700   |
|                      | Br 1.86194500 1.01753000 -0.54608500   | F 1.52421800 0.99363800 0.04864900    | F 1.37950800 0.99002500 -0.16272300   |
|                      | Br -0.38437100 -1.38791000 0.31935900  | F -0.40352400 -0.72527800 -0.25164800 | F -0.47376100 -0.76433700 0.03636200  |
|                      | Mo -2.10778500 1.21954100 -3.16513100  | W -2.17236000 1.22734900 -2.82731000  | W -2.07308400 1.25133300 -3.06966400  |
|                      | O -1.12380000 0.89114800 -1.90321700   | O -1.91582300 1.27225200 -4.46070500  | O -0.78505200 1.09614200 -2.00581400  |
|                      | Br -3.58042900 2.99528300 -2.36312100  | F -0.33926800 1.13782900 -2.16041500  | F -3.16962900 2.54041700 -2.36978100  |
|                      | Br -0.89791600 2.97650600 -4.36576400  | F -2.06447000 3.00853500 -2.37862200  | F -1.56389300 2.53836000 -4.27667000  |
|                      | Br -1.42455200 -0.28957000 -4.96299400 | F -3.99315300 1.29037100 -2.67734600  | F -1.73232100 0.06215300 -4.42685700  |

**Table S3. (continued)**

|                    |    |             |             |             |    |             |             |             |    |             |             |             |
|--------------------|----|-------------|-------------|-------------|----|-------------|-------------|-------------|----|-------------|-------------|-------------|
|                    | Br | -3.99293500 | -0.29660700 | -2.79576700 | F  | -2.19553700 | -0.58232000 | -2.49704300 | F  | -3.34257900 | 0.04848200  | -2.52440600 |
| WCl <sub>4</sub> O | W  | -0.37158300 | 1.04663100  | 0.48265700  | W  | -0.17935100 | 1.04082600  | 0.57596600  | W  | -0.26293000 | 1.04579800  | 0.63081600  |
|                    | O  | -0.21431200 | 1.21364300  | 2.11739300  | O  | -0.34309200 | 0.99454200  | 2.21677700  | O  | 0.28539500  | 1.25425200  | 2.17365700  |
|                    | Cl | -2.65762400 | 1.01216200  | 0.21844500  | Cl | -2.45172100 | 1.14847000  | -0.09370000 | Cl | -2.55363400 | 1.04221700  | 0.92209800  |
|                    | Cl | -0.42510500 | 3.24496300  | -0.22188500 | Cl | -0.12694800 | 3.29513300  | 0.18288200  | Cl | -0.48172100 | 3.22996200  | -0.09430900 |
|                    | Cl | 1.83076000  | 1.00114000  | -0.21003200 | Cl | 2.07969500  | 0.96643500  | 0.28109400  | Cl | 1.68974200  | 0.95467000  | -0.58006900 |
|                    | Cl | -0.39258200 | -1.24099300 | 0.23099400  | Cl | -0.29330800 | -1.18206200 | 0.04188300  | Cl | -0.37896300 | -1.24350600 | 0.46512400  |
|                    | W  | -0.37976400 | 1.02056000  | -3.76006800 | W  | -2.28978000 | 1.24252900  | -3.20622800 | W  | -2.12723800 | 1.20779000  | -3.13727100 |
|                    | O  | -0.59681200 | 0.80645300  | -2.11921500 | O  | -2.12663800 | 1.28882600  | -4.84710900 | O  | -1.17546800 | 0.73663000  | -1.84980700 |
|                    | Cl | -2.49917200 | 1.09297600  | -4.61404700 | Cl | -0.01680200 | 1.13535400  | -2.53675400 | Cl | -3.51067900 | 2.81018400  | -2.29320500 |
|                    | Cl | -0.34411700 | 3.28531600  | -4.03443400 | Cl | -2.17559400 | 3.46512000  | -2.67117700 | Cl | -0.94705600 | 2.92194300  | -4.08152700 |
|                    | Cl | 1.88587200  | 1.09419100  | -4.02271900 | Cl | -4.54881500 | 1.31679200  | -2.91042500 | Cl | -1.42633100 | -0.05867000 | -4.90754500 |
|                    | Cl | -0.26685800 | -1.09946900 | -4.60795600 | Cl | -2.34162400 | -1.01172600 | -2.81259700 | Cl | -3.92509500 | -0.20103000 | -3.02734800 |
| WBr <sub>4</sub> O | W  | -0.38669900 | 1.03156500  | 0.47965500  | W  | -0.12430600 | 1.03460200  | 0.71473200  | W  | -0.26679000 | 1.00868500  | 0.63243900  |
|                    | O  | -0.41255900 | 1.04394900  | 2.12895500  | O  | -0.27333500 | 0.98831400  | 2.35575500  | O  | 0.29318700  | 0.78975100  | 2.16811400  |
|                    | Br | -2.80628100 | 1.03028400  | -0.05156100 | Br | -2.55323400 | 1.14857200  | 0.02449700  | Br | -2.71090100 | 1.19149900  | 1.02933700  |
|                    | Br | -0.37962000 | 3.45643300  | -0.03040400 | Br | -0.05256900 | 3.45619400  | 0.30217100  | Br | -0.21853100 | 3.47284900  | 0.43199200  |
|                    | Br | 2.04792300  | 1.03033700  | 0.02487800  | Br | 2.30335100  | 0.95289700  | 0.38047800  | Br | 1.83053600  | 0.93612900  | -0.67258700 |
|                    | Br | -0.37982100 | -1.39888300 | 0.00625700  | Br | -0.23517200 | -1.35417200 | 0.15029800  | Br | -0.67773300 | -1.33188900 | -0.07991000 |
|                    | W  | -0.35187500 | 1.04546500  | -3.73857900 | W  | -2.34465600 | 1.24871100  | -3.34476800 | W  | -2.11009400 | 1.27743100  | -3.12148000 |
|                    | O  | -0.34889800 | 1.01546300  | -2.07051700 | O  | -2.19448500 | 1.29568600  | -4.98563100 | O  | -1.15136000 | 1.33842300  | -1.75669100 |
|                    | Br | -2.73372200 | 1.05562700  | -4.31393600 | Br | 0.08374500  | 1.13433900  | -2.65271600 | Br | -3.83554800 | 2.94846300  | -2.62753700 |
|                    | Br | -0.35341600 | 3.43482200  | -4.27915200 | Br | -2.23371700 | 3.63779600  | -2.77946500 | Br | -1.16029000 | 2.92052200  | -4.67261400 |
|                    | Br | 2.02699500  | 1.05558600  | -4.32671600 | Br | -4.77282800 | 1.33054500  | -3.01170200 | Br | -0.99969000 | -0.43826300 | -4.48038500 |
|                    | Br | -0.35332200 | -1.32307700 | -4.36974700 | Br | -2.41677200 | -1.17324300 | -2.93303700 | Br | -3.80676400 | -0.41336000 | -2.63006500 |
| WF <sub>4</sub> S  |    |             |             |             | W  | -0.43819900 | 1.39664900  | 0.32932300  | W  | -0.33271800 | 1.30723000  | 1.17467900  |
|                    |    |             |             |             | F  | -2.23028900 | 1.38202900  | -0.09208200 | F  | -1.94671800 | 0.64916600  | 0.55701300  |
|                    |    |             |             |             | F  | -0.44131200 | 3.21898800  | 0.11626700  | F  | -1.04670100 | 2.98156700  | 0.86165200  |
|                    |    |             |             |             | F  | 1.34719700  | 1.38498700  | -0.11974800 | F  | 1.30814000  | 2.07558800  | 0.80391000  |
|                    |    |             |             |             | F  | -0.44189800 | -0.41555800 | -0.33760500 | F  | 0.39958400  | -0.25437200 | 0.50917900  |
|                    |    |             |             |             | S  | -0.42215300 | 1.12278700  | 2.38463500  | S  | -0.38066400 | 1.06048300  | 3.23626300  |
|                    |    |             |             |             | W  | -0.46108000 | -0.47511300 | -2.78769200 | W  | 0.97824100  | 3.26316500  | -2.51624400 |
|                    |    |             |             |             | F  | -0.45740900 | 1.33715800  | -2.12027600 | F  | 1.72281000  | 2.98963300  | -4.17870500 |
|                    |    |             |             |             | F  | -2.24643800 | -0.46345400 | -2.33855100 | F  | -0.06484700 | 4.52316800  | -3.36652900 |
|                    |    |             |             |             | F  | -0.45793300 | -2.29749000 | -2.57475100 | F  | 0.83776800  | 4.34793100  | -1.04091600 |
|                    |    |             |             |             | F  | 1.33097300  | -0.46042200 | -2.36618500 | F  | 2.63176600  | 2.79857900  | -1.85768100 |
|                    |    |             |             |             | S  | -0.47712000 | -0.20107300 | -4.84296300 | S  | -0.27507900 | 1.62266700  | -2.18550900 |
| WCl <sub>4</sub> S |    |             |             |             | W  | -0.43521500 | 1.50785100  | 0.77687200  | W  | -0.41156600 | 1.16269000  | 1.48718800  |
|                    |    |             |             |             | Cl | -2.66420800 | 1.50358400  | 0.24677000  | Cl | -2.32391200 | 0.34188900  | 0.49542900  |
|                    |    |             |             |             | Cl | -0.44052800 | 3.76087600  | 0.36917200  | Cl | -1.36332900 | 3.23612500  | 1.24268700  |
|                    |    |             |             |             | Cl | 1.78513800  | 1.50795200  | 0.21115200  | Cl | 1.61208200  | 2.23238700  | 1.37878400  |

**Table S3. (continued)**

|                     |   |                                        |                                       |
|---------------------|---|----------------------------------------|---------------------------------------|
|                     |   | Cl -0.43814600 -0.73180100 0.10053100  | Cl 0.65716100 -0.63442800 0.53196400  |
|                     |   | S -0.41869900 1.36894200 2.83627200    | S -0.62981300 0.68369900 3.48479000   |
|                     |   | W -0.46402700 -0.58643400 -3.23510900  | W 1.01692000 3.35384800 -2.75330000   |
|                     |   | Cl -0.46164100 1.65460100 -2.56155000  | Cl 1.75581100 2.67259500 -4.81696800  |
|                     |   | Cl -2.68403800 -0.58625200 -2.66896100 | Cl -0.28249200 4.86247000 -3.89540100 |
|                     |   | Cl -0.45841700 -2.83927800 -2.82615400 | Cl 1.02364800 4.88415400 -1.04837500  |
|                     |   | Cl 1.76441600 -0.58116600 -2.70397400  | Cl 3.07040800 2.69702200 -1.97368200  |
|                     |   | S -0.48029700 -0.44938700 -5.29464900  | S -0.29333400 1.87235700 -2.13600400  |
| WBr <sub>4</sub> S  | - | W -0.43414200 1.56255500 0.91738800    | W -0.44320600 1.11449900 1.55711500   |
|                     |   | Br -2.82838300 1.56685300 0.35170200   | Br -2.47784300 0.24110100 0.44923100  |
|                     |   | Br -0.44008500 3.98392300 0.46760100   | Br -1.46093100 3.34180700 1.30079600  |
|                     |   | Br 1.95111200 1.57229700 0.31470700    | Br 1.73039400 2.25853500 1.51372300   |
|                     |   | Br -0.43637000 -0.83489100 0.22039700  | Br 0.72176200 -0.80836800 0.53989300  |
|                     |   | S -0.41807200 1.43922300 2.97432200    | S -0.70616600 0.61425700 3.54039400   |
|                     |   | W -0.46518200 -0.64202700 -3.37588100  | W 1.03377100 3.38377100 -2.79320300   |
|                     |   | Br -0.46292300 1.75809400 -2.67991900  | Br 1.72732400 2.54611200 -5.00383000  |
|                     |   | Br -2.84976800 -0.65015600 -2.77244700 | Br -0.42011400 4.94834000 -4.01986400 |
|                     |   | Br -0.45877400 -3.06236600 -2.92505500 | Br 1.10046200 5.08581000 -1.01853900  |
|                     |   | Br 1.92836200 -0.64437400 -2.80958200  | Br 3.26717500 2.70608700 -2.01162700  |
|                     |   | S -0.48143600 -0.51964300 -5.43285800  | S -0.24104400 1.93285400 -2.05697600  |
| WF <sub>4</sub> Se  | - | W -0.37794500 1.17729600 0.75675400    | W -0.33412800 1.29471900 1.18887600   |
|                     |   | F -2.12595200 1.25469700 0.18747900    | F -1.95520200 0.61994300 0.60859200   |
|                     |   | F -0.33857100 3.05680600 0.34858800    | F -1.06166400 2.95954100 0.86545700   |
|                     |   | F 1.43566900 1.24134400 0.45246900     | F 1.29559700 2.06295900 0.78071100    |
|                     |   | F -0.35025500 -0.59341700 0.27685600   | F 0.39183000 -0.27313300 0.53264300   |
|                     |   | Se -0.54230100 1.14869000 2.96592100   | Se -0.34716100 1.06286300 3.39633300  |
|                     |   | W -0.15545900 3.46572400 -2.09536600   | W 0.99508100 3.29621000 -2.55687500   |
|                     |   | F -0.18501800 5.23494100 -1.61121500   | F 1.79895600 3.05370700 -4.19561300   |
|                     |   | F -1.96986500 3.39940600 -1.79294700   | F 0.01300500 4.60002000 -3.41180100   |
|                     |   | F -0.19341500 1.58587300 -1.68905900   | F 0.81098900 4.34025200 -1.05745700   |
|                     |   | F 1.59289400 3.38889300 -1.52672300    | F 2.61263200 2.78667300 -1.84729800   |
|                     |   | Se 0.00971800 3.49869400 -4.30449000   | Se -0.38835100 1.56105400 -2.30645500 |
| WCl <sub>4</sub> Se | - | W -0.41053000 1.01572300 1.19381000    | W -0.41748000 1.14768100 1.51380000   |
|                     |   | Cl -2.58226700 1.09451800 0.47273800   | Cl -2.35452000 0.31820100 0.57597500  |
|                     |   | Cl -0.37858400 3.31972200 0.83429100   | Cl -1.35471100 3.21925400 1.22504100  |
|                     |   | Cl 1.84390200 1.08581000 0.79975900    | Cl 1.61280800 2.19057400 1.34042200   |
|                     |   | Cl -0.36093100 -1.15599200 0.46843400  | Cl 0.61314000 -0.68571300 0.58798100  |
|                     |   | Se -0.57292700 0.85215100 3.38844300   | Se -0.61970500 0.69756100 3.66570600  |
|                     |   | W -0.12290700 3.62749000 -2.53264400   | W 1.04090100 3.39158700 -2.80961200   |
|                     |   | Cl -0.17087700 5.79960900 -1.80815200  | Cl 1.84198200 2.78370200 -4.87210800  |
|                     |   | Cl -2.37734600 3.55910100 -2.13837000  | Cl -0.23468400 4.92872100 -3.93760800 |

**Table S3. (continued)**

|                     |   |    |             |             |             |    |             |             |             |
|---------------------|---|----|-------------|-------------|-------------|----|-------------|-------------|-------------|
|                     |   | Cl | -0.15632700 | 1.32365500  | -2.17170800 | Cl | 0.98697300  | 4.86355900  | -1.05641000 |
|                     |   | Cl | 2.04861300  | 3.54742800  | -1.81096100 | Cl | 3.07936600  | 2.73212400  | -1.99704300 |
|                     |   | Se | 0.03968200  | 3.78973200  | -4.72737200 | Se | -0.36248700 | 1.77755600  | -2.23903100 |
| WBr <sub>4</sub> Se | - | W  | -0.42200100 | 0.95496000  | 1.33230900  | W  | -0.43664200 | 1.07304800  | 1.58279200  |
|                     |   | Br | -2.75551500 | 1.03814100  | 0.56450400  | Br | -2.50595300 | 0.20463800  | 0.53403000  |
|                     |   | Br | -0.37686300 | 3.41660400  | 0.95156000  | Br | -1.44598100 | 3.30200000  | 1.32982100  |
|                     |   | Br | 1.99862300  | 1.00575900  | 0.90938300  | Br | 1.74076000  | 2.19739000  | 1.46456300  |
|                     |   | Br | -0.38168200 | -1.38189900 | 0.55518600  | Br | 0.68198600  | -0.86673100 | 0.54771600  |
|                     |   | Se | -0.58238000 | 0.79079900  | 3.52340800  | Se | -0.66441600 | 0.55998200  | 3.71412100  |
|                     |   | W  | -0.11130900 | 3.68831300  | -2.67080900 | W  | 1.04536000  | 3.44608400  | -2.84912300 |
|                     |   | Br | -0.15237300 | 6.02408500  | -1.89121300 | Br | 1.79653900  | 2.71171100  | -5.07620100 |
|                     |   | Br | -2.53238100 | 3.63678200  | -2.24973900 | Br | -0.37570200 | 5.06478700  | -4.04075700 |
|                     |   | Br | -0.15638400 | 1.22662100  | -2.29057800 | Br | 1.06436200  | 5.06568200  | -0.99941700 |
|                     |   | Br | 2.22257100  | 3.60488400  | -1.90396400 | Br | 3.26287400  | 2.74469500  | -2.04703300 |
|                     |   | Se | 0.04919600  | 3.85389800  | -4.86177900 | Se | -0.33160300 | 1.86151800  | -2.16339900 |
